# Supplementary material for: Single-cell sequencing deciphers a convergent evolution of copy number alterations from primary to circulating tumor cells
Source: PubMed Central journal article supplement — Genome Res. 2017 Aug;27(8):1312–22. doi: 10.1101/gr.216788.116 (PMC5538548; doi:10.1101/gr.216788.116), 2017-08
Supplement: supp_gr.216788.116_Supplemental_Material.pdf [file supp_gr.216788.116_Supplemental_Material.pdf]

# Supplemental Material

## Table of Contents

### Supplemental Figures

- Figure S1.** Distribution of mapped read depth across GC contents.
- Figure S2.** Normalization of read depth throughout the genome.
- Figure S3.** SNVs in normal leukocytes.
- Figure S4.** CBS segmentation of binned (500 K) read depths of single cells from patient CO1.
- Figure S5.** Identification of junctions among DNA breakpoints at the CNA boundaries in primary tumour, and metastases 2 and 3.
- Figure S6.** Identification of the junction between DNA breakpoints b and e at the CNA boundaries.
- Figure S7.** Identification of the junction between DNA breakpoints c and g at the CNA boundaries.
- Figure S8.** Identification of the junction between DNA breakpoints f and h at the CNA boundaries.
- Figure S9.** PCR validation of breakpoint junctions at chromosome 8.
- Figure S10.** Length distribution of CNAs in a single cell (BR3).
- Figure S11.** CNAs of 97 CTCs from 23 patients of four cancer types.
- Figure S12.** CBS segmentation of binned (500K) read depths of single cells from gastric and breast cancer patients.

### Supplemental Tables

- Table S1.** Patient information.
- Table S2.** Summary of non-synonymous SNVs and INDELS identified in primary tumour tissue from Patient CO1.
- Table S3.** Genomic sequencing information for all samples.
- Table S4.** Mutation information and PCR primers for the 20 SNVs in Patient CO1.
- Table S5.** Concurrent and mutually exclusive regions

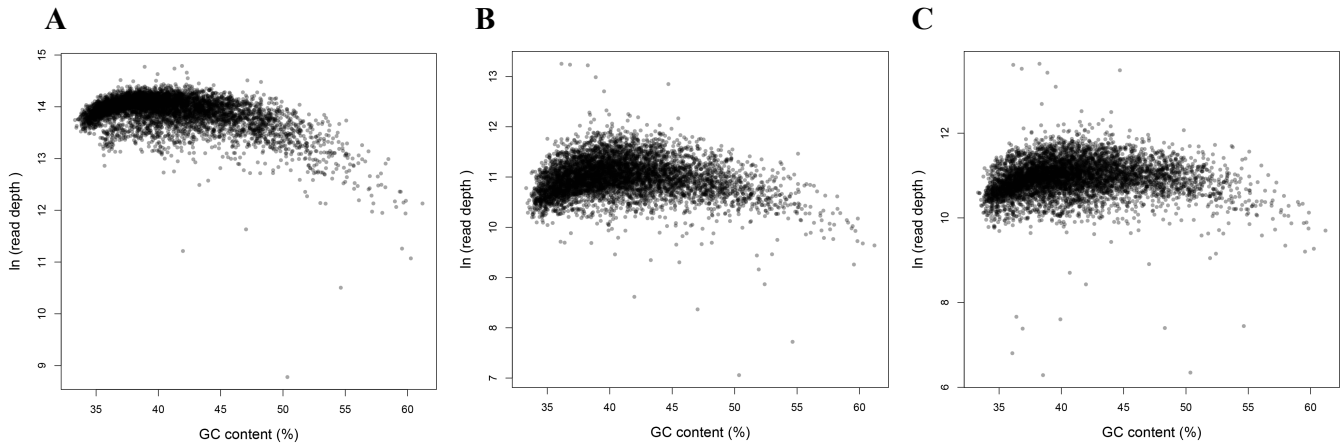

**Figure S1. Distribution of mapped read depth across GC contents.**

- (A) Sequence read depth versus GC percentage based on sequence data from a control leukocyte (CO1L1D). The bin size is 500 kb.
- (B) Sequence read depth versus GC percentage based on sequence data from a primary tumour cell (CO1PC28L). The bin size is 500 kb.
- (C) Sequence read depth versus GC percentage based on sequence data from a CTC (CO1C1L). The bin size is 500 kb.

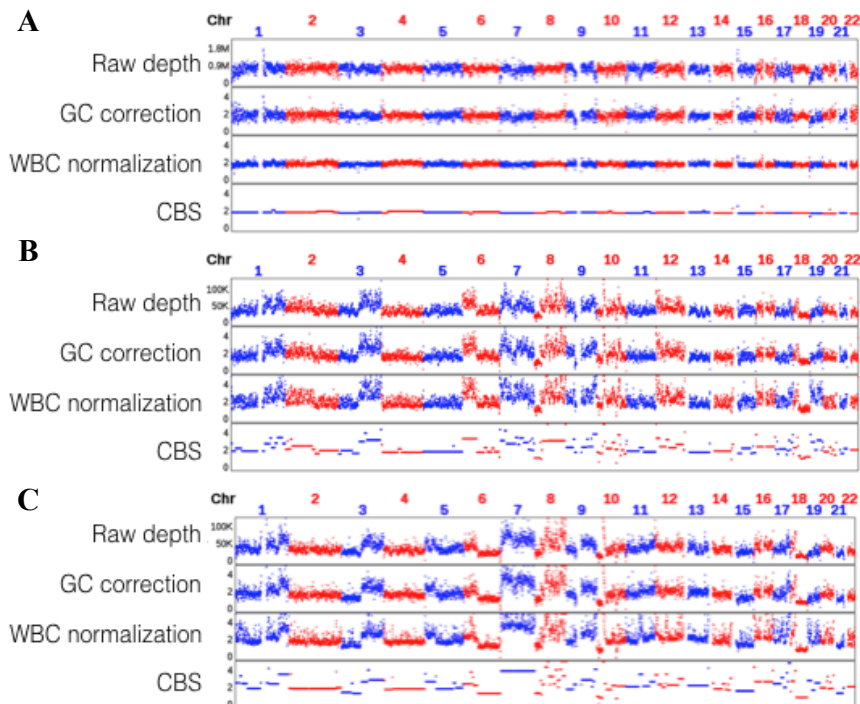

**Figure S2. Normalization of read depth throughout the genome.** Raw depth, Sequence read depth after GC correction, read depth normalized using white blood cells (WBCs) as the control, read depth segmented using the circular segmentation (CBS) algorithm after WBC normalization are plotted from sequence data from a control leukocyte (CO1L1D) (A), a primary tumour cell (CO1PC28L) (B), and a CTC (CO1C1L) (C).

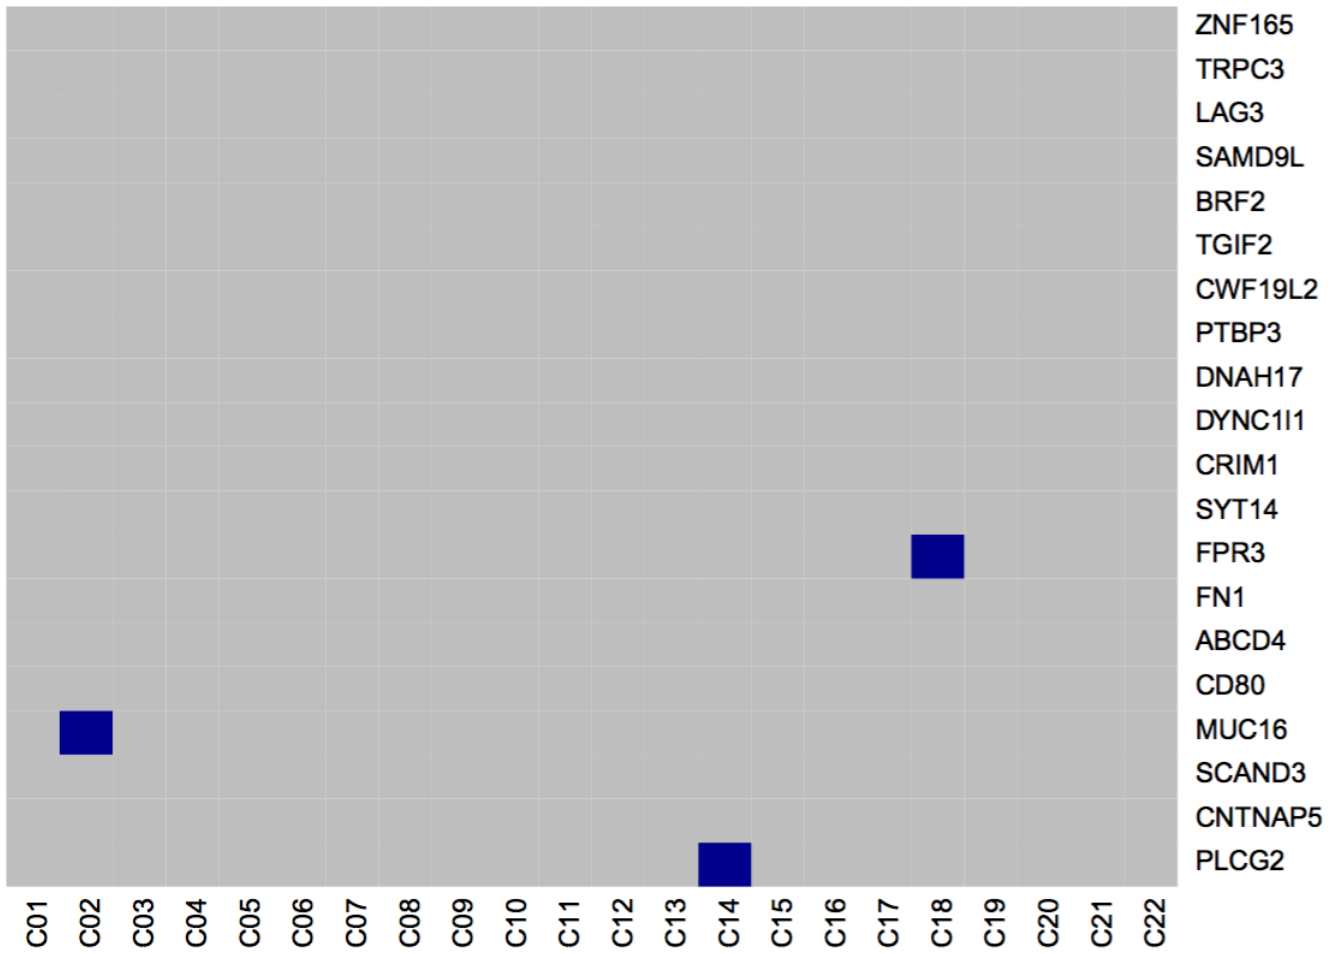

**Figure S3. SNVs in normal leukocytes.** The distribution of 20 non-synonymous mutations in Fig. 1B was assessed in 22 normal cells (DAPI+, anti-CD45+, and anti-cytokeratin-).

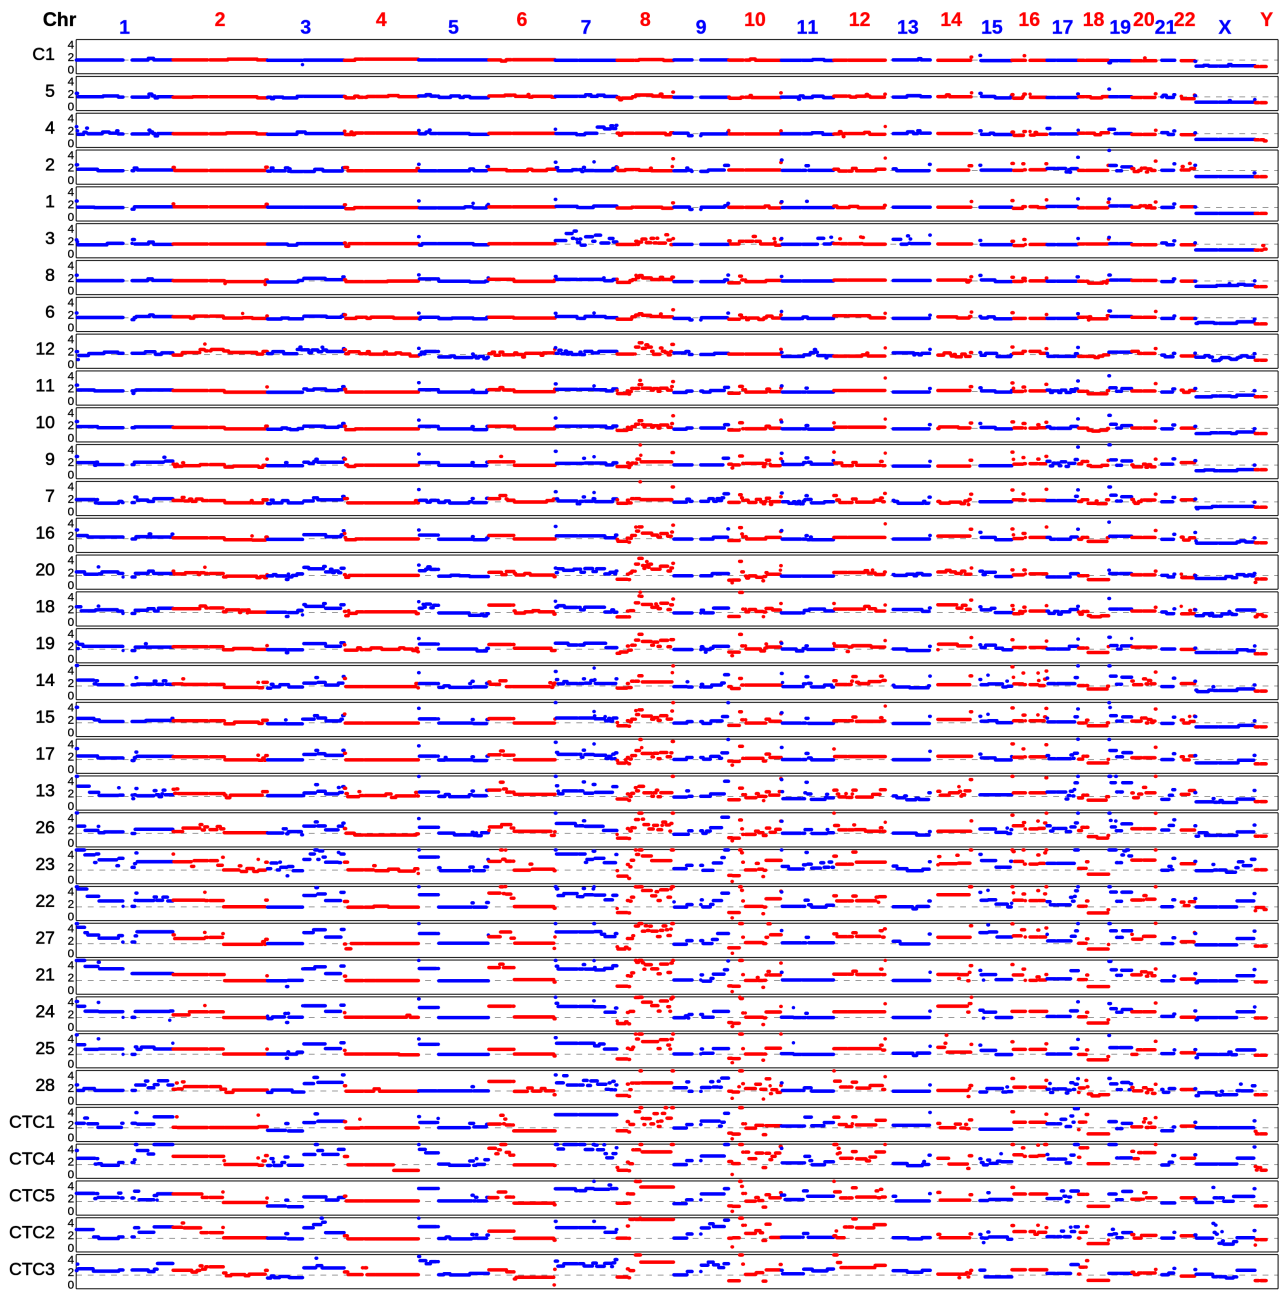

**Figure S4.** CBS segmentation of binned (500 kb) read depths of single cells from patient CO1.

**A**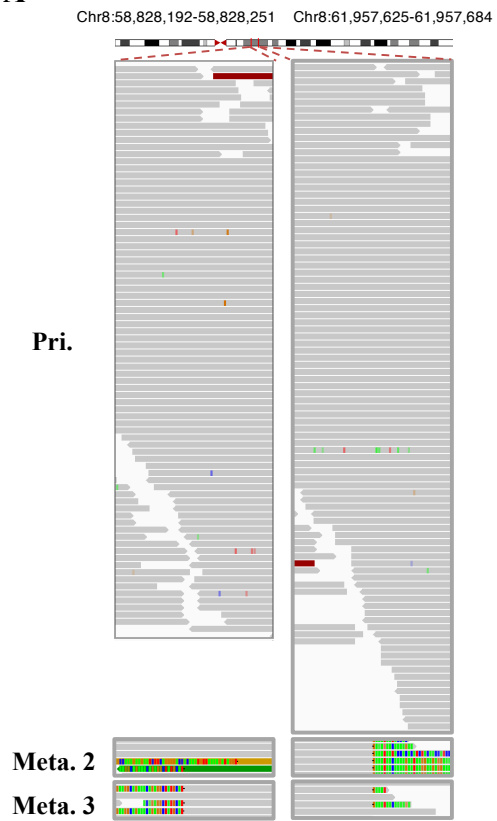**B**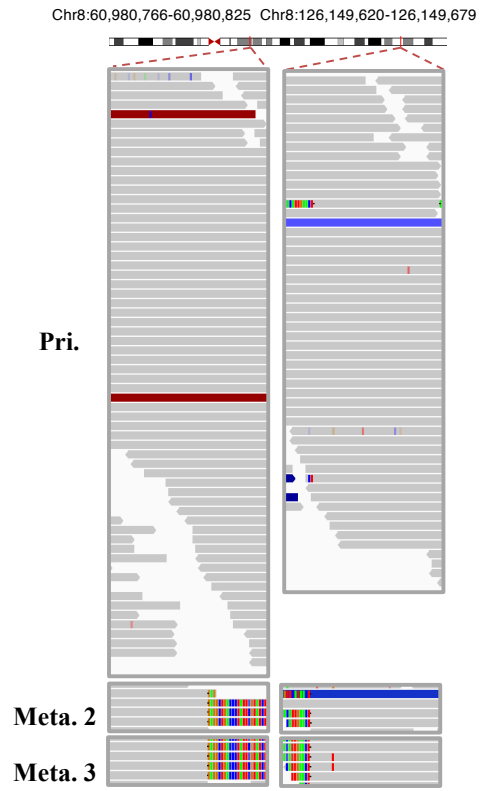**C**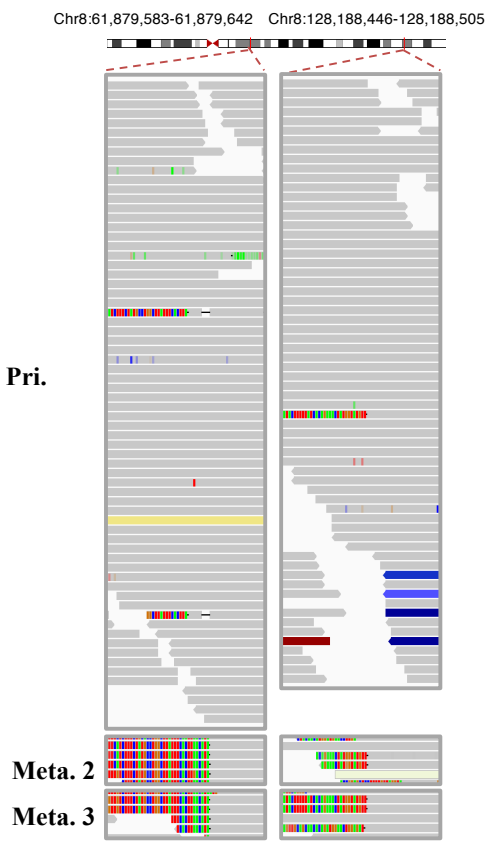**D**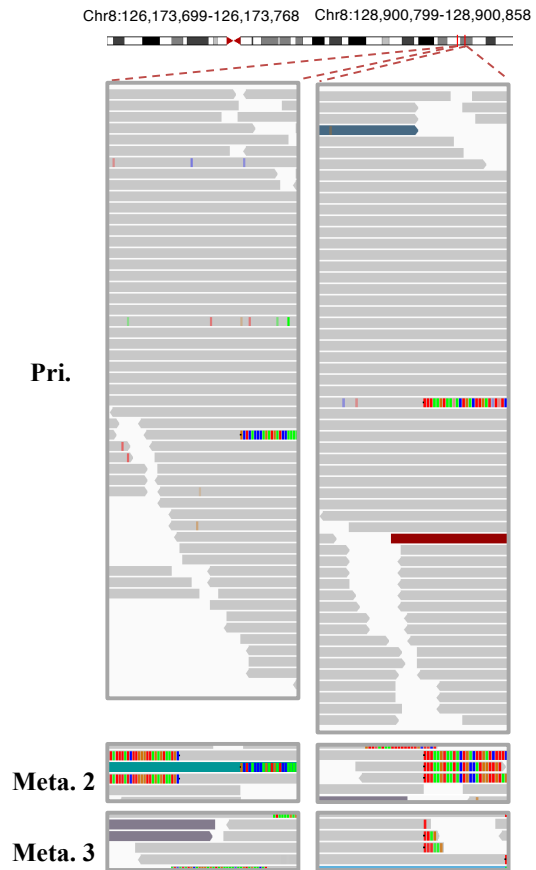

**Figure S5. Identification of junctions among DNA breakpoints at the CNA boundaries in primary tumour, and metastases 2 and 3.**

- (A) Aligned reads around breakpoints **a** and **d** are visualized using IGV.
- (B) Aligned reads around breakpoints **b** and **e** are visualized using IGV.
- (C) Aligned reads around breakpoints **c** and **g** are visualized using IGV.
- (D) Aligned reads around breakpoints **f** and **h** are visualized using IGV.

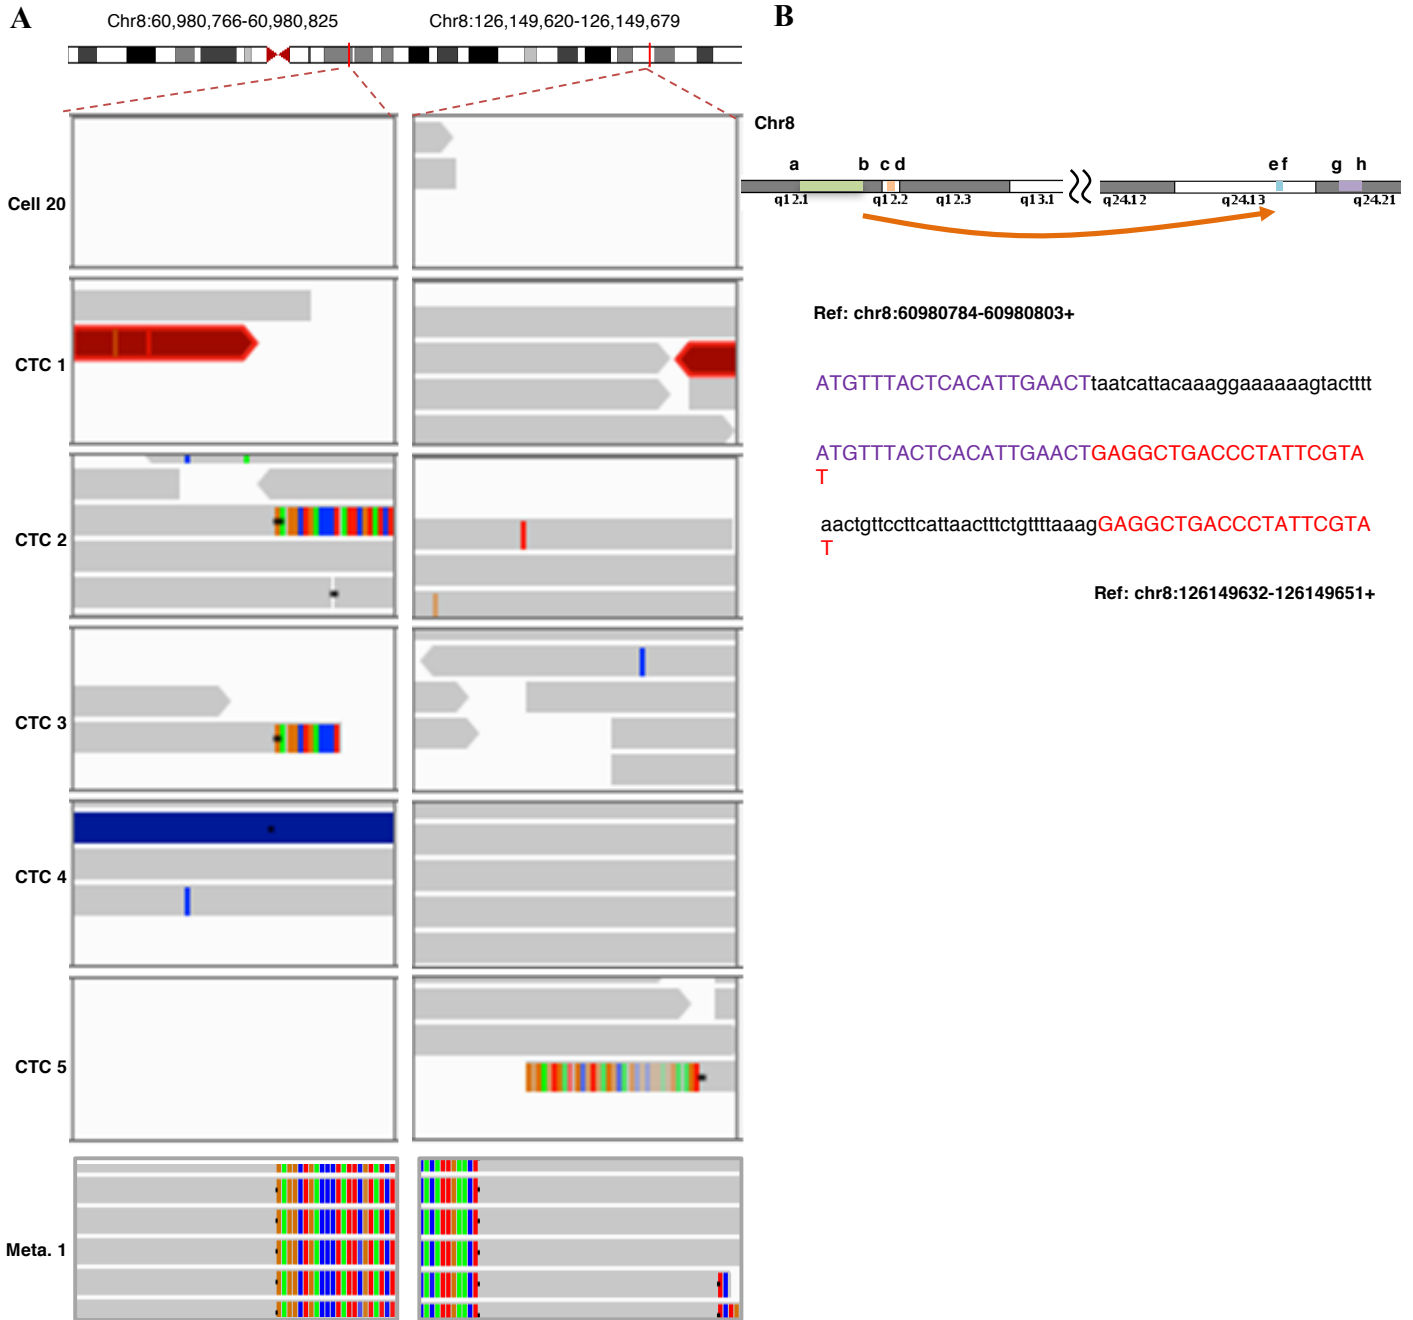

**Figure S6. Identification of the junction between DNA breakpoints b and e at the CNA boundaries.**

(A) Visualization of aligned reads around breakpoints b and e using IGV. Alignments are represented as gray with base mismatches color-coded (“A”, green; “T”, red; “G”, yellow; “C”, blue). Soft-clipped (colorful) bases around one breakpoint can be mapped to the reference genome around another joined breakpoint. Read pairs mapped to chromosome regions separated much larger than the estimated insert size are indicated by red color. This junction has limited sequencing read supports in CTCs, probably due to the single cell amplification bias in this region. Further PCR amplification followed by deep sequencing confirms its unambiguous existence in all CTCs and metastases (Supplementary Figs. 8, 9).

(B) Sequences at the junction of breakpoints b and e. A representative sequence read (middle) is mapped to two regions (above and below) in the reference genome with appropriate orientation (“+”, forward strand).

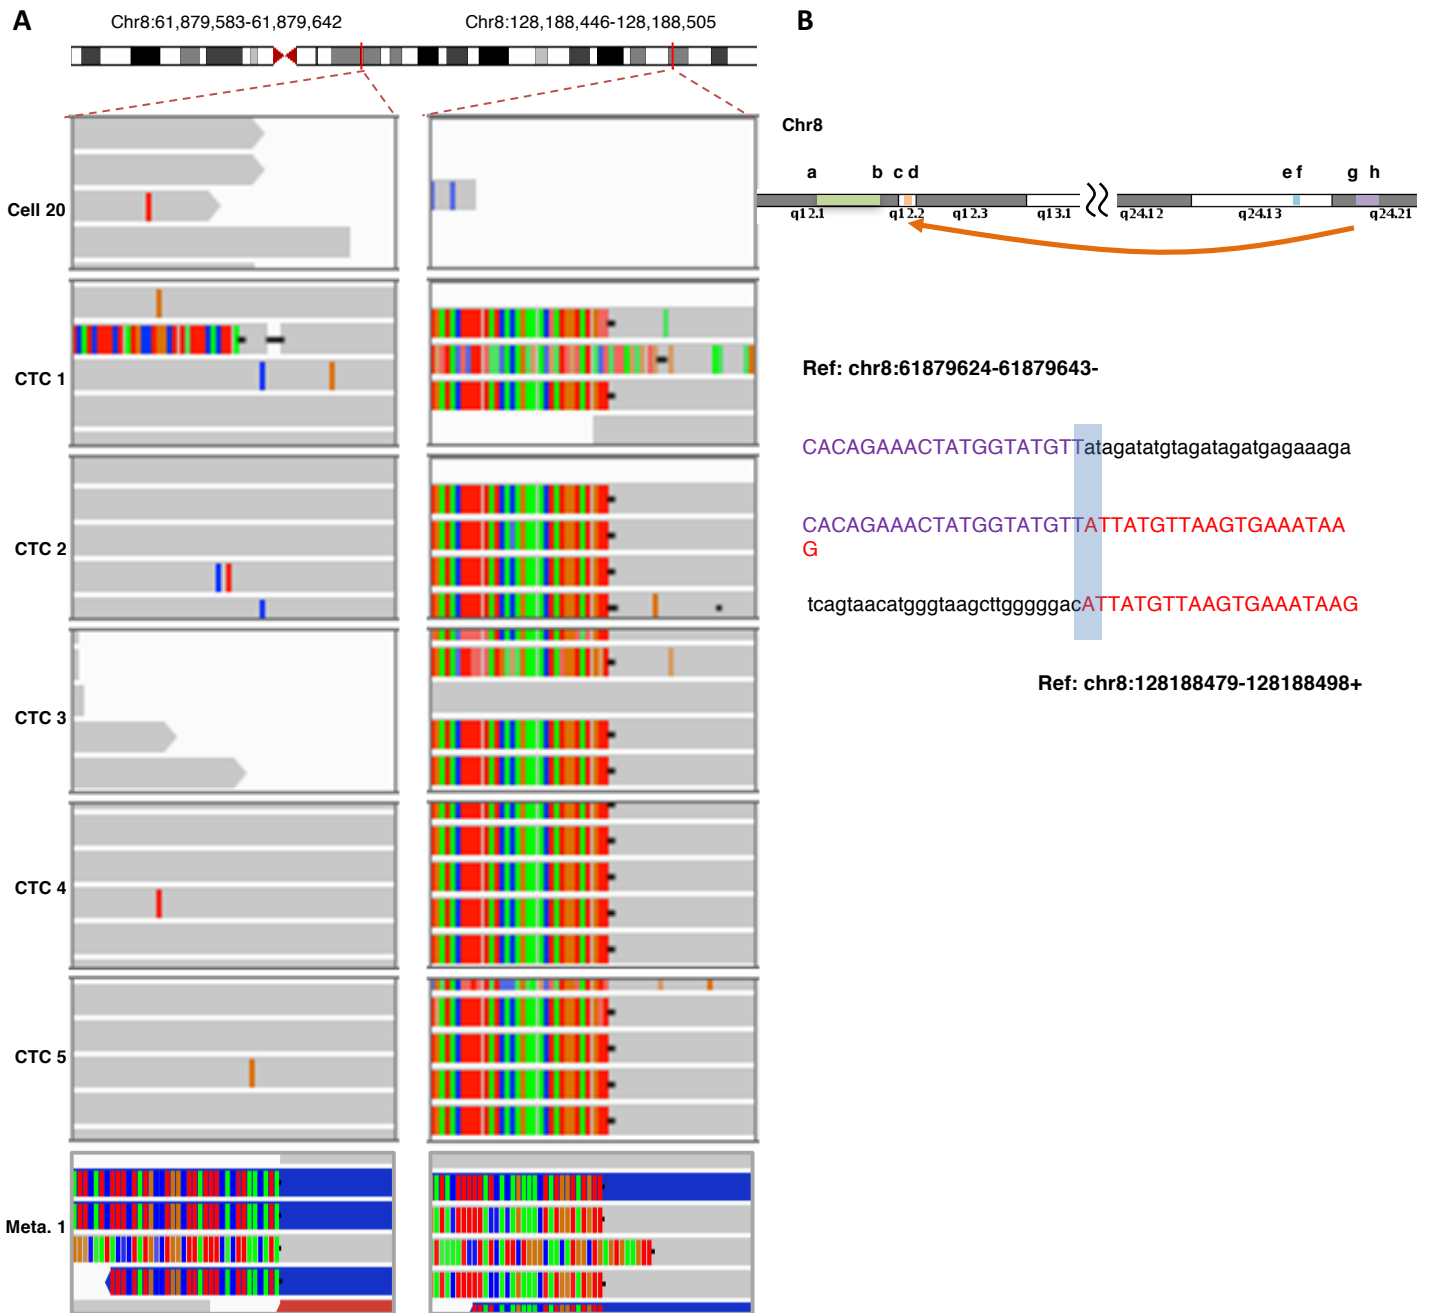

**Figure S7. Identification of the junction between DNA breakpoints c and g at the CNA boundaries.** (A) Visualization of aligned reads around breakpoints c and g using IGV. Alignments are represented as gray with base mismatches color-coded (“A”, green; “T”, red; “G”, yellow; “C”, blue). Soft-clipped (colorful) bases around one breakpoint can be mapped to the reference genome around another joined breakpoint. Read pairs mapped to chromosome regions separated much larger than the estimated insert size are indicated by red color. (B) Sequences at the junction of breakpoints c and g. A representative sequence read (middle) is mapped to two regions (above and below) in the reference genome with appropriate orientation (‘+’, forward strand; ‘-’, reverse strand).



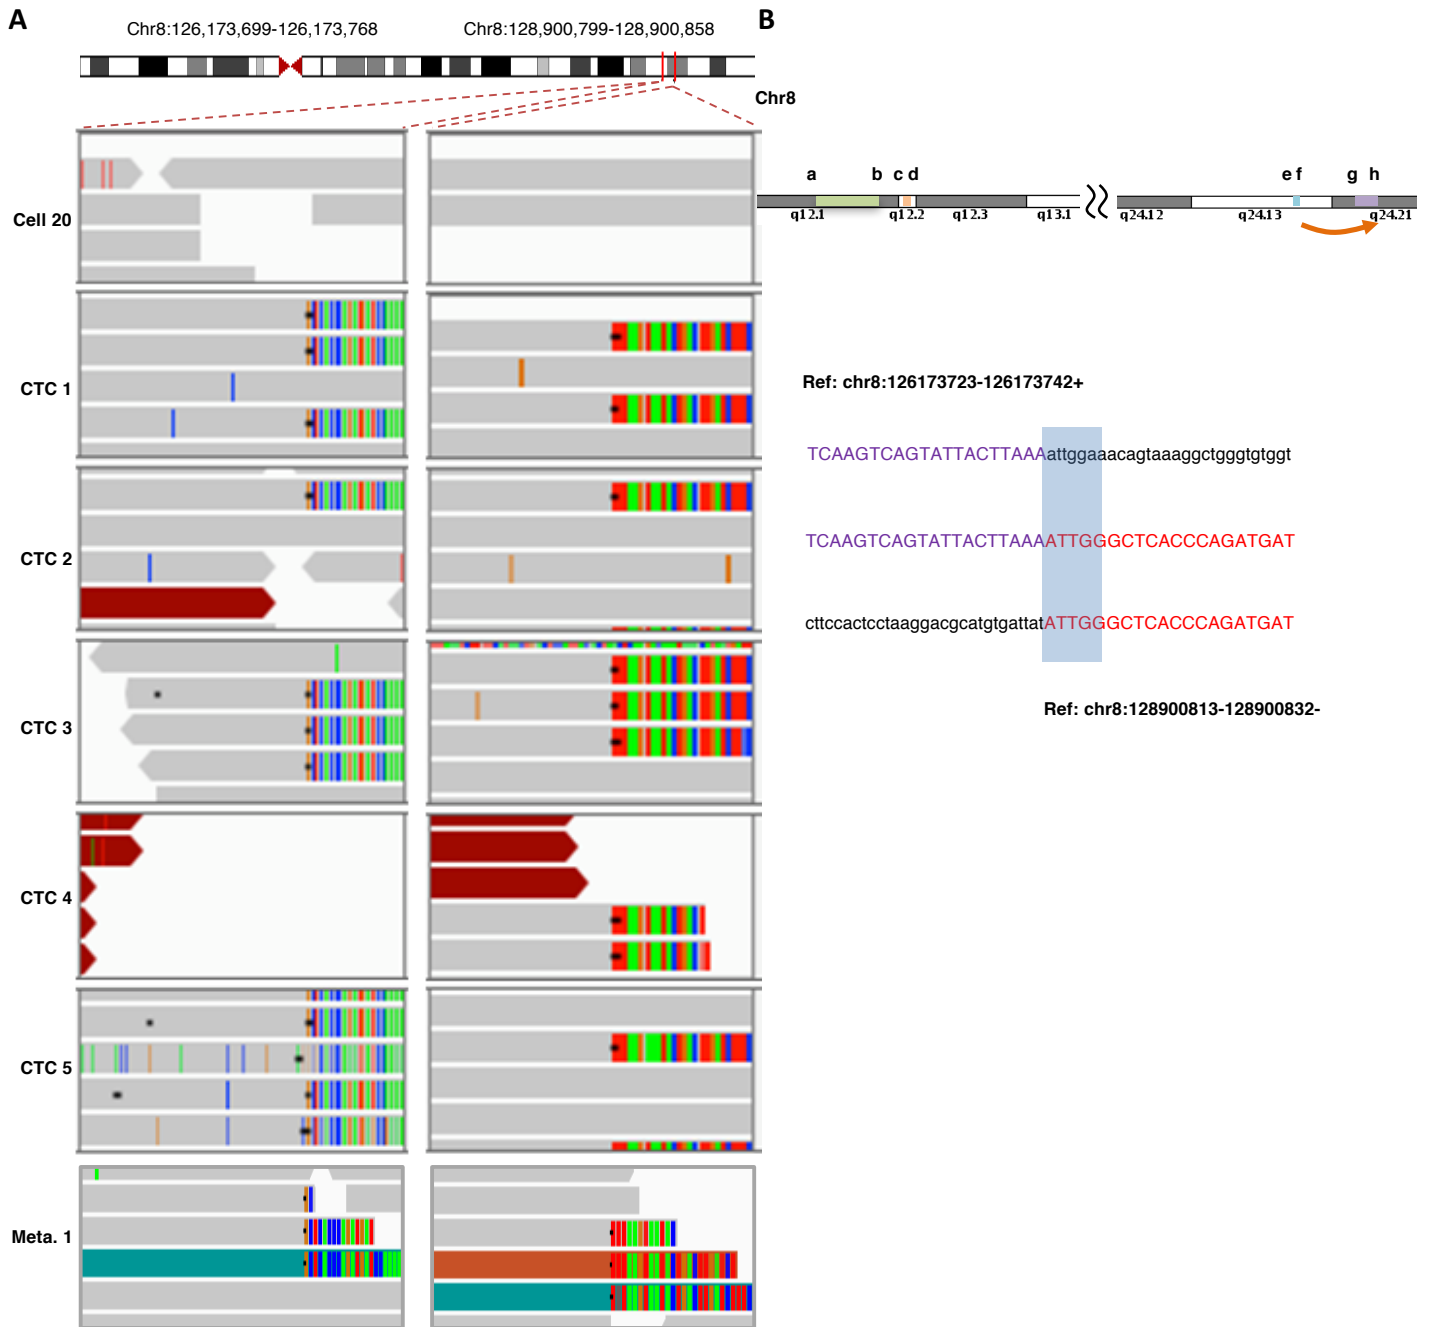

**Figure S8. Identification of the junction between DNA breakpoints *f* and *h* at the CNA boundaries.**  
**(A)** Visualization of aligned reads around breakpoints *f* and *h* using IGV. Alignments are represented as gray with base mismatches color-coded (“A”, green; “T”, red; “G”, yellow; “C”, blue). Soft-clipped (colorful) bases around one breakpoint can be mapped to the reference genome around another joined breakpoint. Read pairs mapped to chromosome regions separated much larger than the estimated insert size are indicated by red color.  
**(B)** Sequences at the junction of breakpoints *f* and *h*. A representative sequence read (middle) is mapped to two regions (above and below) in the reference genome with appropriate orientation (+, forward strand; -, reverse strand).

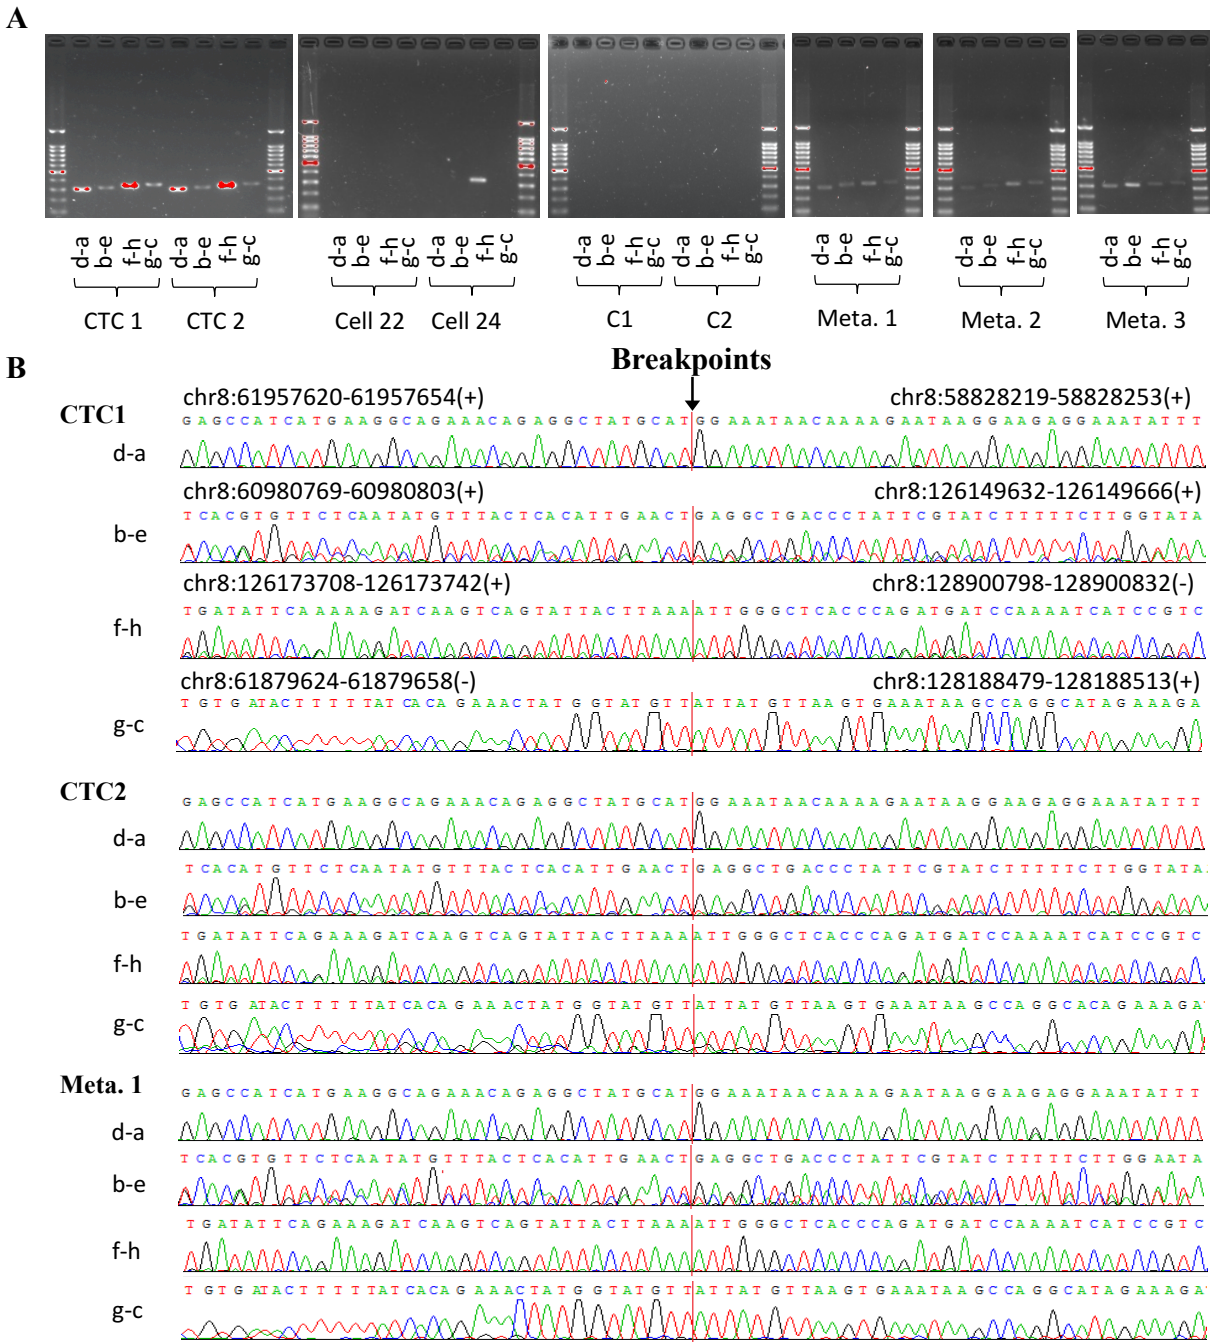

**Figure S9. PCR validation of breakpoint junctions at Chromosome 8.**

(A) Representative PCR products around breakpoint junctions are visualized in the agarose gel. Primers at each side of the breakpoint junction are designed in the appropriate orientation. The single bands observed in the gel from two CTCs (CTC 1 and CTC 2) represent PCR products of the four junctions (breakpoints **d-a**, **b-e**, **f-h**, **g-c**). Only one of the two primary tumour cells (Cell 24) shows a gel band corresponding to the junction of breakpoint **f-h**. The two control leukocytes (C1 and C2) have no band corresponding to the junctions. All three metastases (Meta. 1, 2 and 3) show gel bands corresponding to the four junctions (breakpoints **d-a**, **b-e**, **f-h**, **g-c**).

(B) Sanger sequencing of the PCR products in CTC 1, CTC 2, and a metastasis (Meta. 1). The genomic positions of the breakpoint junctions are marked by the red lines and the sequences at each side of the breakpoint junctions are identified.

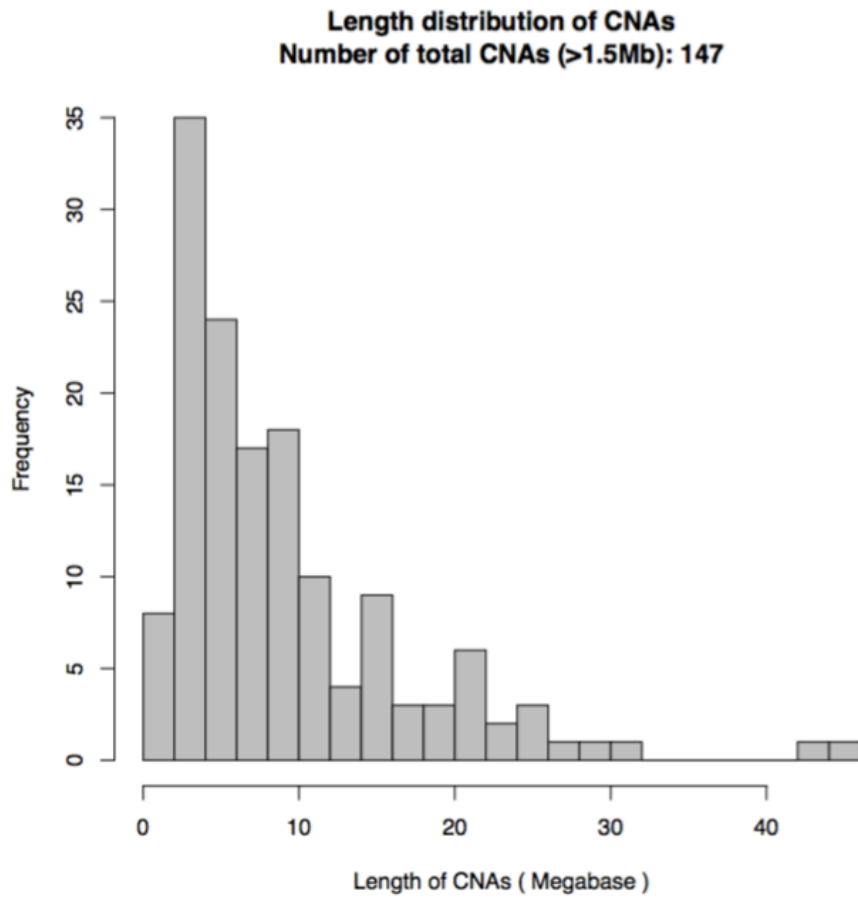

**Figure S10. Length distribution of CNAs in a single cell (BR3).**

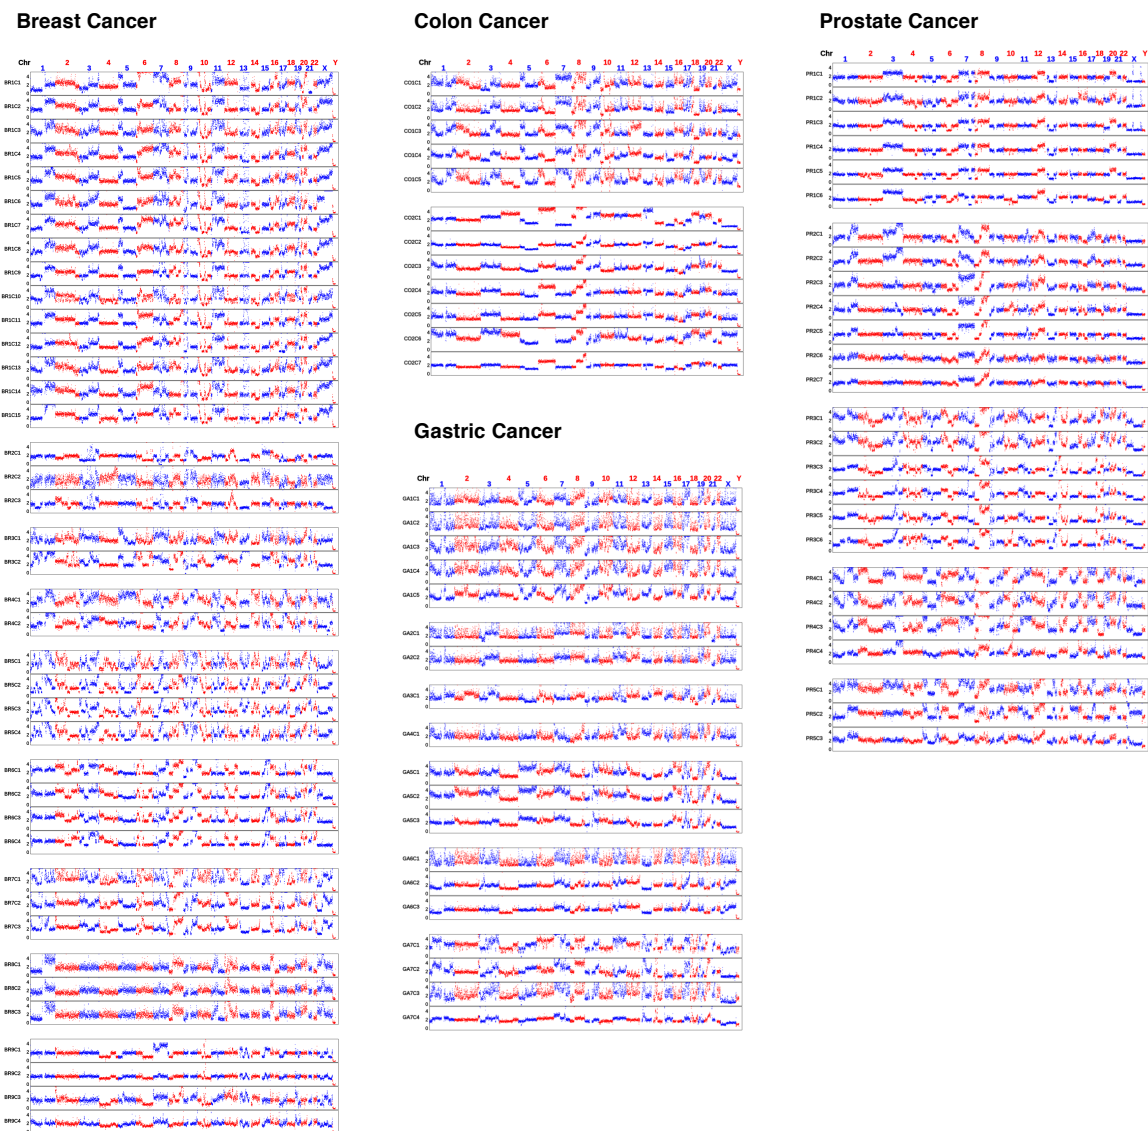

**Figure S11. CNAs of 97 CTCs from 23 patients of four cancer types.** CNAs of individual CTCs from each patient are shown in a linear plot along the genome at a bin size of 500 kb (blue and red dots). Reproducible CNA patterns of CTCs from each patient are observed. (BR-, breast cancer; CO-, colon cancer; PR-, prostate cancer; GA-, gastric cancer)

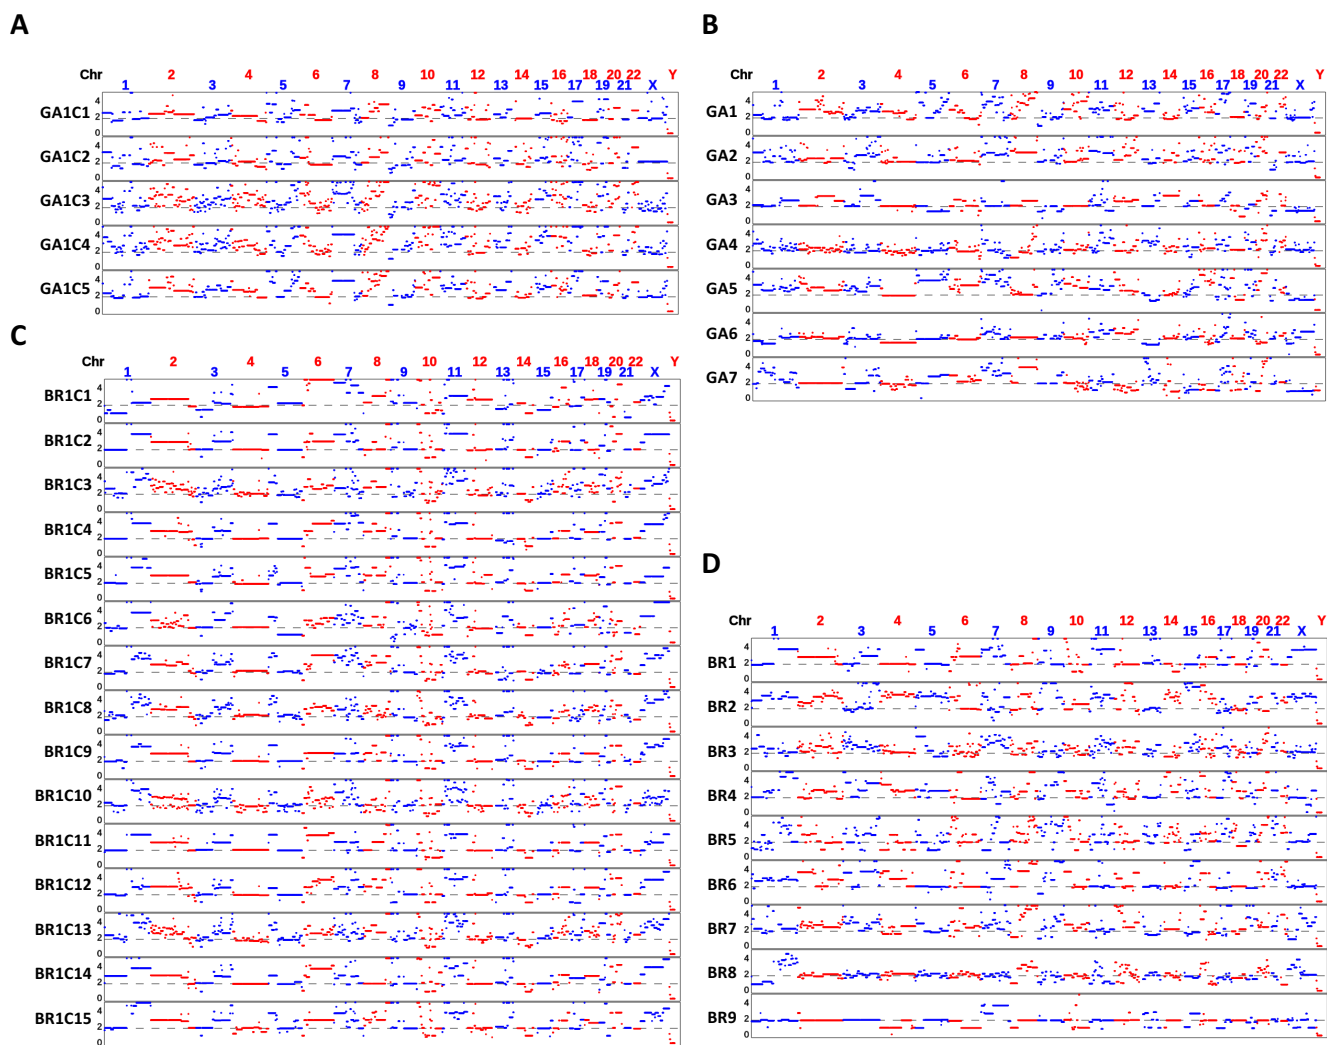

**Figure S12. CBS segmentation of binned (500 kb) read depths of single cells from gastric and breast cancer patients.**

(A) Segmented copy numbers in 5 CTCs from a gastric patient.

(B) Segmented copy numbers in CTCs from different gastric patients. One CTC was used for each patient.

(C) Segmented copy numbers in 15 CTCs from a breast cancer patient.

(D) Segmented copy numbers in CTCs from different breast cancer patients. One CTC was used for each patient.

**Table S1. Patient information**

| Patient ID | Age | Sex | Primary Cancer  | Stage | Number of CTCs isolated | Number of CTCs sequenced | Treatments before CTC isolation                                         |
|------------|-----|-----|-----------------|-------|-------------------------|--------------------------|-------------------------------------------------------------------------|
| *CO1       | 67  | M   | Colon cancer    | IIIC  | 14                      | 5                        | Surgery                                                                 |
| CO2        | 61  | F   | Colon cancer    | IV    | 12                      | 7                        | Treatment naïve                                                         |
| BR1        | 46  | F   | Breast cancer   | IIIA  | 50                      | 15                       | Chemotherapy, surgery                                                   |
| BR2        | 47  | F   | Breast cancer   | IV    | 9                       | 3                        | Hormonal therapy, chemotherapy                                          |
| BR3        | 44  | F   | Breast cancer   | IIA   | 3                       | 2                        | Surgery, chemotherapy                                                   |
| BR4        | 57  | F   | Breast cancer   | IIIA  | 7                       | 2                        | Surgery, chemotherapy, hormonal and targeted therapy                    |
| BR5        | 79  | F   | Breast cancer   | IIA   | 20                      | 4                        | Surgery, chemotherapy                                                   |
| BR6        | 34  | F   | Breast cancer   | NA    | 10                      | 4                        | Chemotherapy, surgery                                                   |
| BR7        | 61  | F   | Breast cancer   | IV    | 6                       | 3                        | Treatment naïve                                                         |
| BR8        | 55  | F   | Breast cancer   | I     | 10                      | 3                        | Surgery, hormonal therapy                                               |
| BR9        | 56  | F   | Breast cancer   | IIIA  | 29                      | 4                        | Chemotherapy, surgery                                                   |
| GA1        | 52  | M   | Gastric cancer  | IV    | 10                      | 5                        | Treatment naïve                                                         |
| GA2        | 24  | M   | Gastric cancer  | IV    | 5                       | 2                        | Treatment naïve                                                         |
| GA3        | 61  | M   | Gastric cancer  | IIIB  | 1                       | 1                        | Surgery, chemotherapy                                                   |
| GA4        | 54  | F   | Gastric cancer  | IIB   | 2                       | 1                        | Surgery, chemotherapy                                                   |
| GA5        | 36  | F   | Gastric cancer  | IV    | 5                       | 3                        | Treatment naïve                                                         |
| GA6        | 31  | F   | Gastric cancer  | IV    | 8                       | 3                        | Treatment naïve                                                         |
| GA7        | 43  | M   | Gastric cancer  | IV    | 9                       | 4                        | Treatment naïve                                                         |
| PR1        | 73  | M   | Prostate cancer | IV    | 18                      | 6                        | Hormonal therapy, surgery                                               |
| PR2        | 58  | M   | Prostate cancer | IV    | 12                      | 7                        | Surgery, hormonal therapy                                               |
| PR3        | 72  | M   | Prostate cancer | IV    | 10                      | 6                        | Hormonal therapy, radiotherapy                                          |
| PR4        | 85  | M   | Prostate cancer | IV    | 6                       | 4                        | Surgery, hormonal therapy, immunotherapy                                |
| PR5        | 76  | M   | Prostate cancer | NA    | 6                       | 3                        | Surgery, radiotherapy, hormonal therapy, chemotherapy and immunotherapy |

\*For patient CO1, a total of 28 primary tumour cells were also sequenced.

**Table S2. Summary of non-synonymous SNVs and INDELs identified in primary tumour tissue from Patient CO1.**

| Chr | Position  | Wild type | Mutant            | Change type | Gene name | Transcript_ID | Exon Rank | Effect                | old_AA / new_AA | Old_codon / New_codon | Codon# | Wild type Coverage | Mutant Coverage |
|-----|-----------|-----------|-------------------|-------------|-----------|---------------|-----------|-----------------------|-----------------|-----------------------|--------|--------------------|-----------------|
| 1   | 11854557  | T         | C                 | SNP         | MTHFR     | NM_005957     | 8         | NON_SYNONYMOUS_CODING | D/G             | gAc/gGc               | 402    | 65                 | 16              |
| 1   | 37949192  | T         | A                 | SNP         | ZC3H12A   | NM_025079     | 6         | NON_SYNONYMOUS_CODING | S/T             | Tcc/Acc               | 594    | 9                  | 8               |
| 1   | 117156600 | T         | C                 | SNP         | IGSF3     | NM_001542     | 4         | NON_SYNONYMOUS_CODING | S/G             | Agc/Ggc               | 207    | 41                 | 24              |
| 1   | 197026149 | A         | C                 | SNP         | F13B      | NM_001994     | 7         | NON_SYNONYMOUS_CODING | C/G             | Tgt/Ggt               | 389    | 115                | 16              |
| 1   | 210334241 | A         | C                 | SNP         | SYT14     | NM_153262     | 8         | NON_SYNONYMOUS_CODING | K/Q             | Aaa/Caa               | 508    | 187                | 38              |
| 1   | 227268607 | C         | A                 | SNP         | CDC42BPA  | NM_003607     | 17        | STOP_GAINED           | E/*             | Gaa/Taa               | 823    | 156                | 66              |
| 1   | 236734766 | A         | G                 | SNP         | HEATR1    | NM_018072     | 28        | NON_SYNONYMOUS_CODING | L/S             | tTa/tCa               | 1278   | 120                | 22              |
| 2   | 36706666  | G         | A                 | SNP         | CRIM1     | NM_016441     | 7         | NON_SYNONYMOUS_CODING | A/T             | Gct/Act               | 401    | 89                 | 41              |
| 2   | 64147624  | A         | C                 | SNP         | VPS54     | NM_016516     | 14        | NON_SYNONYMOUS_CODING | I/M             | atT/atG               | 669    | 137                | 14              |
| 2   | 125521571 | G         | A                 | SNP         | CNTNAP5   | NM_130773     | 16        | NON_SYNONYMOUS_CODING | V/I             | Gtc/Atc               | 793    | 192                | 57              |
| 2   | 216272920 | G         | A                 | SNP         | FN1       | NM_002026     | 17        | NON_SYNONYMOUS_CODING | A/V             | gCg/gTg               | 810    | 71                 | 40              |
| 2   | 241987743 | G         | C                 | SNP         | SNED1     | NM_001080437  | 9         | NON_SYNONYMOUS_CODING | V/L             | Gtg/Ctg               | 429    | 23                 | 17              |
| 3   | 119276553 | C         | A                 | SNP         | CD80      | NM_005191     | 2         | NON_SYNONYMOUS_CODING | G/V             | gGa/gTa               | 8      | 53                 | 20              |
| 3   | 173996677 | A         | C                 | SNP         | NLGN1     | NM_014932     | 6         | NON_SYNONYMOUS_CODING | S/R             | Agt/Cgt               | 296    | 129                | 21              |
| 3   | 184104439 | C         | T                 | SNP         | CHRD      | NM_003741     | 16        | NON_SYNONYMOUS_CODING | R/W             | Cgg/Tgg               | 698    | 25                 | 20              |
| 4   | 366974    | A         | G                 | SNP         | ZNF141    | NM_003441     | 4         | NON_SYNONYMOUS_CODING | T/A             | Act/Gct               | 250    | 39                 | 8               |
| 4   | 367001    | G         | A                 | SNP         | ZNF141    | NM_003441     | 4         | NON_SYNONYMOUS_CODING | E/K             | Gaa/Aaa               | 259    | 51                 | 8               |
| 4   | 100052687 | C         | T                 | SNP         | ADH4      | NM_000670     | 6         | NON_SYNONYMOUS_CODING | A/T             | Gcc/Acc               | 271    | 14                 | 4               |
| 4   | 122831528 | C         | G                 | SNP         | TRPC3     | NM_003305     | 5         | NON_SYNONYMOUS_CODING | E/Q             | Gaa/Caa               | 452    | 140                | 70              |
| 5   | 135561910 | C         | A                 | SNP         | TRPC7     | NM_020389     | 9         | NON_SYNONYMOUS_CODING | A/S             | Gca/Tca               | 692    | 79                 | 21              |
| 5   | 138749926 | C         | T                 | SNP         | DNAJC18   | NM_152686     | 8         | NON_SYNONYMOUS_CODING | D/N             | Gat/Aat               | 330    | 102                | 25              |
| 5   | 158596061 | C         | G                 | SNP         | RNF145    | NM_144726     | 8         | NON_SYNONYMOUS_CODING | G/A             | gGc/gCc               | 342    | 42                 | 11              |
| 5   | 178040560 | *         | +T                | INS         | CLK4      | NM_020666     | 7         | FRAME_SHIFT           | -/?             | -/A                   | 247    | 34                 | 12              |
| 6   | 28056791  | A         | C                 | SNP         | ZNF165    | NM_003447     | 4         | NON_SYNONYMOUS_CODING | H/P             | cAt/cCt               | 334    | 150                | 45              |
| 6   | 28543756  | C         | G                 | SNP         | SCAND3    | NM_052923     | 3         | NON_SYNONYMOUS_CODING | K/N             | aaG/aaC               | 242    | 126                | 31              |
| 6   | 30955051  | A         | G                 | SNP         | MUC21     | NM_001010909  | 2         | NON_SYNONYMOUS_CODING | T/A             | Acg/Gcg               | 367    | 58                 | 8               |
| 7   | 92760652  | T         | A                 | SNP         | SAMD9L    | NM_152703     | 5         | STOP_GAINED           | K/*             | Aaa/Taa               | 1545   | 158                | 18              |
| 7   | 95606859  | G         | T                 | SNP         | DYNC111   | NM_004411     | 7         | NON_SYNONYMOUS_CODING | V/F             | Gtt/Ttt               | 193    | 141                | 54              |
| 7   | 128413917 | G         | A                 | SNP         | OPN1SW    | NM_001708     | 4         | NON_SYNONYMOUS_CODING | A/V             | Gct/gTt               | 238    | 43                 | 8               |
| 7   | 157931088 | C         | T                 | SNP         | PTPRN2    | NM_002847     | 7         | NON_SYNONYMOUS_CODING | D/N             | Gac/Aac               | 344    | 24                 | 6               |
| 8   | 37702522  | C         | T                 | SNP         | BRF2      | NM_018310     | 4         | NON_SYNONYMOUS_CODING | R/Q             | cGa/cAa               | 249    | 69                 | 18              |
| 8   | 131826347 | G         | A                 | SNP         | ADCY8     | NM_001115     | 14        | NON_SYNONYMOUS_CODING | R/C             | Cgc/Tgc               | 961    | 39                 | 17              |
| 9   | 19573429  | C         | G                 | SNP         | SLC24A2   | NM_020344     | 6         | NON_SYNONYMOUS_CODING | E/Q             | Gaa/Caa               | 423    | 84                 | 23              |
| 9   | 114989690 | C         | T                 | SNP         | PTBP3     | NM_005156     |           | SPLICE_SITE_DONOR     |                 |                       |        | 61                 | 35              |
| 9   | 136199031 | G         | A                 | SNP         | SURF6     | NM_006753     | 5         | NON_SYNONYMOUS_CODING | R/C             | Cgc/Tgc               | 254    | 67                 | 21              |
| 9   | 139301992 | C         | T                 | SNP         | SDCCAG3   | NM_006643     | 4         | NON_SYNONYMOUS_CODING | G/R             | Gga/Aga               | 119    | 9                  | 3               |
| 11  | 107197743 | G         | T                 | SNP         | CWF19L2   | NM_152434     | 18        | NON_SYNONYMOUS_CODING | L/I             | Ctt/Att               | 860    | 88                 | 35              |
| 12  | 6883836   | G         | A                 | SNP         | LAG3      | NM_002286     | 4         | NON_SYNONYMOUS_CODING | R/H             | cGc/cAc               | 196    | 93                 | 47              |
| 12  | 123875223 | C         | T                 | SNP         | SETD8     | NM_020382     | 3         | NON_SYNONYMOUS_CODING | P/L             | cCg/cTg               | 60     | 51                 | 8               |
| 14  | 51707081  | C         | T                 | SNP         | TMX1      | NM_030755     | 1         | NON_SYNONYMOUS_CODING | T/M             | aCg/aTg               | 24     | 49                 | 15              |
| 14  | 74753441  | G         | A                 | SNP         | ABCD4     | NM_005050     | 18        | NON_SYNONYMOUS_CODING | T/M             | aCg/aTg               | 572    | 46                 | 19              |
| 14  | 92537353  | C         | T                 | SNP         | ATXN3     | NM_004993     | 10        | NON_SYNONYMOUS_CODING | G/E             | gGg/gAg               | 306    | 34                 | 7               |
| 14  | 96707161  | G         | T                 | SNP         | BDKRB2    | NM_000623     | 3         | NON_SYNONYMOUS_CODING | G/C             | Ggc/Tgc               | 166    | 52                 | 6               |
| 16  | 81942154  | G         | A                 | SNP         | PLCG2     | NM_002661     | 17        | NON_SYNONYMOUS_CODING | R/Q             | cGg/cAg               | 564    | 12                 | 3               |
| 17  | 76422660  | C         | T                 | SNP         | DNAH17    | NM_173628     | 79        | NON_SYNONYMOUS_CODING | D/N             | Gac/Aac               | 4265   | 48                 | 25              |
| 19  | 9028305   | A         | G                 | SNP         | MUC16     | NM_024690     | 11        | NON_SYNONYMOUS_CODING | Y/H             | Tac/Cac               | 12163  | 101                | 13              |
| 19  | 19757090  | C         | T                 | SNP         | ATP13A1   | NM_020410     | 23        | NON_SYNONYMOUS_CODING | V/I             | Gtc/Atc               | 1058   | 57                 | 8               |
| 19  | 46443413  | G         | A                 | SNP         | NOVA2     | NM_002516     | 4         | NON_SYNONYMOUS_CODING | T/M             | aCg/aTg               | 396    | 37                 | 5               |
| 19  | 50500776  | C         | T                 | SNP         | VRK3      | NM_016440     | 7         | NON_SYNONYMOUS_CODING | A/T             | Gcc/Acc               | 222    | 47                 | 15              |
| 19  | 52327071  | G         | A                 | SNP         | FPR3      | NM_002030     | 2         | NON_SYNONYMOUS_CODING | V/I             | Gtt/Att               | 24     | 48                 | 22              |
| 20  | 31812162  | A         | C                 | SNP         | BPIFA3    | NM_178466     | 3         | NON_SYNONYMOUS_CODING | I/L             | Atc/Ctc               | 94     | 52                 | 10              |
| 20  | 35219641  | G         | A                 | SNP         | TGIF2     | NM_021809     | 3         | NON_SYNONYMOUS_CODING | S/N             | aGc/aAc               | 174    | 67                 | 10              |
| 22  | 50716652  | *         | GGCCGCA<br>CCAGGT | DEL         | PLXNB2    | NM_012401     | 31        | FRAME_SHIFT           | -/-             | -/-                   | 1590   | 26                 | 27              |
| X   | 106486523 | T         | C                 | SNP         | CXorf41   | NM_173494     | 7         | NON_SYNONYMOUS_CODING | F/L             | Ttc/Ctc               | 214    | 13                 | 11              |

**Table S3. Genomic sequencing information for all samples.**

| Sample Name | Sample Type                  | Patient ID | Sequencing Type | Raw Reads (MB) | Raw Bases (MB) | Mapped Reads (MB) | Mapping Rate (reads) | Mapped Bases (MB) | Mapping Rate (bases) | Duplication Rate |
|-------------|------------------------------|------------|-----------------|----------------|----------------|-------------------|----------------------|-------------------|----------------------|------------------|
| CO1B1E      | Blood gDNA                   | CO1        | WES             | 71.39          | 6425.39        | 71.13             | 99.62%               | 6303.47           | 98.10%               | 13.95%           |
| CO1P1E      | Primary tumour gDNA          | CO1        | WES             | 71.95          | 7050.73        | 71.71             | 99.67%               | 6971.67           | 98.88%               | 8.20%            |
| CO1B1D      | Blood gDNA                   | CO1        | WGS             | 602.86         | 84816.54       | 569.15            | 94.41%               | 79539.72          | 93.78%               | 8.93%            |
| CO1P1D      | Primary tumour gDNA          | CO1        | WGS             | 829.68         | 116654.65      | 789.71            | 95.18%               | 109986.23         | 94.28%               | 10.66%           |
| CO1M1D      | Lymph node metastasis 1 gDNA | CO1        | WGS             | 151.20         | 15619.60       | 150.24            | 99.37%               | 13905.50          | 89.03%               | 7.83%            |
| CO1M2D      | Lymph node metastasis 2 gDNA | CO1        | WGS             | 150.18         | 15243.32       | 149.50            | 99.55%               | 13475.18          | 88.40%               | 8.52%            |
| CO1M3D      | Lymph node metastasis 3 gDNA | CO1        | WGS             | 220.15         | 21278.09       | 219.07            | 99.51%               | 18930.82          | 88.97%               | 7.54%            |
| CO1L1D      | Single leucocyte             | CO1        | WGS             | 65.79          | 8237.15        | 56.13             | 85.33%               | 6703.83           | 81.39%               | 10.45%           |
| CO1C1D2     | Circulating tumor cell 1     | CO1        | WGS             | 143.31         | 18717.89       | 133.45            | 93.12%               | 17172.31          | 91.74%               | 16.85%           |
| CO1C2D      | Circulating tumor cell 2     | CO1        | WGS             | 97.39          | 12654.45       | 88.68             | 91.06%               | 11032.66          | 87.18%               | 5.25%            |
| CO1C3D      | Circulating tumor cell 3     | CO1        | WGS             | 160.83         | 21017.34       | 149.53            | 92.97%               | 19274.13          | 91.71%               | 17.92%           |
| CO1C4D      | Circulating tumor cell 4     | CO1        | WGS             | 128.04         | 16610.59       | 118.07            | 92.21%               | 14764.70          | 88.89%               | 6.48%            |
| CO1C5D      | Circulating tumor cell 5     | CO1        | WGS             | 100.37         | 12979.40       | 91.92             | 91.58%               | 11424.41          | 88.02%               | 6.10%            |
| CO1PC10D    | Primary tumor cell 10        | CO1        | WGS             | 82.82          | 9569.83        | 73.11             | 88.27%               | 8109.09           | 84.74%               | 15.38%           |
| CO1PC14D    | Primary tumor cell 14        | CO1        | WGS             | 90.21          | 11413.73       | 79.26             | 87.86%               | 9569.57           | 83.84%               | 7.90%            |
| CO1PC15D    | Primary tumor cell 15        | CO1        | WGS             | 79.82          | 10145.82       | 69.03             | 86.48%               | 8321.17           | 82.02%               | 7.25%            |
| CO1PC16D    | Primary tumor cell 16        | CO1        | WGS             | 88.38          | 11112.28       | 76.81             | 86.90%               | 9200.72           | 82.80%               | 6.66%            |
| CO1PC17D    | Primary tumor cell 17        | CO1        | WGS             | 99.71          | 12610.62       | 89.35             | 89.62%               | 10745.96          | 85.21%               | 7.31%            |
| CO1PC18D    | Primary tumor cell 18        | CO1        | WGS             | 87.73          | 10514.17       | 60.35             | 68.79%               | 6599.34           | 62.77%               | 15.72%           |
| CO1PC19D    | Primary tumor cell 19        | CO1        | WGS             | 78.36          | 6268.74        | 66.61             | 85.01%               | 5158.08           | 82.28%               | 15.85%           |
| CO1PC20D    | Primary tumor cell 20        | CO1        | WGS             | 77.88          | 9092.40        | 67.54             | 86.73%               | 7546.42           | 83.00%               | 14.96%           |
| CO1PC21D    | Primary tumor cell 21        | CO1        | WGS             | 139.13         | 17774.02       | 125.43            | 90.15%               | 15722.74          | 88.46%               | 16.26%           |
| CO1PC22D    | Primary tumor cell 22        | CO1        | WGS             | 132.23         | 17009.11       | 121.86            | 92.16%               | 15429.73          | 90.71%               | 16.65%           |
| CO1PC24D    | Primary tumor cell 24        | CO1        | WGS             | 112.59         | 13999.26       | 100.81            | 89.53%               | 12235.69          | 87.40%               | 10.58%           |
| CO1PC25D    | Primary tumor cell 25        | CO1        | WGS             | 100.78         | 12507.13       | 92.17             | 91.46%               | 11213.05          | 89.65%               | 9.67%            |
| CO1PC26D    | Primary tumor cell 26        | CO1        | WGS             | 74.19          | 9450.65        | 62.46             | 84.19%               | 7508.15           | 79.45%               | 5.81%            |
| CO1PC27D    | Primary tumor cell 27        | CO1        | WGS             | 123.90         | 15893.08       | 110.64            | 89.30%               | 13927.17          | 87.63%               | 15.98%           |
| CO1PC28D    | Primary tumor cell 28        | CO1        | WGS             | 144.39         | 18704.56       | 131.98            | 91.40%               | 16826.09          | 89.96%               | 17.29%           |
| CO1PC01L    | Primary tumor cell 1         | CO1        | WGS             | 6.02           | 541.93         | 4.75              | 78.80%               | 379.62            | 70.05%               | 1.51%            |
| CO1PC02L    | Primary tumor cell 2         | CO1        | WGS             | 5.23           | 338.94         | 4.62              | 88.33%               | 288.45            | 85.10%               | 0.53%            |
| CO1PC03L    | Primary tumor cell 3         | CO1        | WGS             | 6.03           | 542.26         | 4.73              | 78.54%               | 378.52            | 69.80%               | 1.60%            |
| CO1PC04L    | Primary tumor cell 4         | CO1        | WGS             | 5.92           | 532.53         | 4.58              | 77.36%               | 365.79            | 68.69%               | 1.65%            |
| CO1PC05L    | Primary tumor cell 5         | CO1        | WGS             | 5.14           | 332.79         | 4.48              | 87.05%               | 279.08            | 83.86%               | 0.52%            |
| CO1PC06L    | Primary tumor cell 6         | CO1        | WGS             | 5.89           | 529.82         | 4.76              | 80.87%               | 382.84            | 72.26%               | 1.47%            |
| CO1PC07L    | Primary tumor cell 7         | CO1        | WGS             | 4.67           | 300.68         | 4.25              | 90.98%               | 264.33            | 87.91%               | 0.33%            |
| CO1PC08L    | Primary tumor cell 8         | CO1        | WGS             | 2.74           | 273.86         | 2.25              | 82.27%               | 210.17            | 76.74%               | 0.36%            |
| CO1PC09L    | Primary tumor cell 9         | CO1        | WGS             | 4.92           | 317.77         | 4.33              | 88.02%               | 269.50            | 84.81%               | 0.51%            |
| CO1PC10L    | Primary tumor cell 10        | CO1        | WGS             | 4.56           | 295.86         | 3.98              | 87.39%               | 248.64            | 84.04%               | 0.57%            |
| CO1PC11L    | Primary tumor cell 11        | CO1        | WGS             | 4.91           | 320.18         | 4.25              | 86.57%               | 266.15            | 83.12%               | 0.58%            |
| CO1PC12L    | Primary tumor cell 12        | CO1        | WGS             | 6.01           | 540.82         | 4.61              | 76.75%               | 368.54            | 68.15%               | 1.81%            |
| CO1PC13L    | Primary tumor cell 13        | CO1        | WGS             | 2.92           | 291.59         | 2.39              | 81.85%               | 221.25            | 75.88%               | 0.38%            |
| CO1PC14L    | Primary tumor cell 14        | CO1        | WGS             | 2.68           | 267.81         | 2.25              | 83.93%               | 209.13            | 78.09%               | 0.34%            |
| CO1PC15L    | Primary tumor cell 15        | CO1        | WGS             | 4.22           | 274.86         | 3.59              | 84.89%               | 224.16            | 81.55%               | 0.55%            |
| CO1PC16L    | Primary tumor cell 16        | CO1        | WGS             | 4.68           | 302.65         | 4.10              | 87.51%               | 255.64            | 84.47%               | 0.50%            |
| CO1PC17L    | Primary tumor cell 17        | CO1        | WGS             | 3.86           | 249.20         | 3.46              | 89.71%               | 215.70            | 86.56%               | 0.36%            |
| CO1PC18L    | Primary tumor cell 18        | CO1        | WGS             | 5.88           | 528.96         | 4.34              | 73.75%               | 346.50            | 65.51%               | 1.65%            |
| CO1PC19L    | Primary tumor cell 19        | CO1        | WGS             | 5.93           | 533.82         | 4.60              | 77.59%               | 367.18            | 68.78%               | 1.63%            |
| CO1PC20L    | Primary tumor cell 20        | CO1        | WGS             | 6.12           | 550.94         | 4.79              | 78.14%               | 381.71            | 69.28%               | 1.63%            |
| CO1PC21L    | Primary tumor cell 21        | CO1        | WGS             | 4.72           | 303.84         | 4.16              | 88.12%               | 257.96            | 84.90%               | 0.43%            |
| CO1PC22L    | Primary tumor cell 22        | CO1        | WGS             | 2.29           | 229.24         | 1.95              | 85.14%               | 182.52            | 79.62%               | 0.24%            |
| CO1PC23L    | Primary tumor cell 23        | CO1        | WGS             | 3.09           | 199.77         | 2.70              | 87.29%               | 168.20            | 84.20%               | 0.43%            |
| CO1PC24L    | Primary tumor cell 24        | CO1        | WGS             | 2.51           | 251.44         | 2.08              | 82.59%               | 193.83            | 77.09%               | 0.35%            |
| CO1PC25L    | Primary tumor cell 25        | CO1        | WGS             | 3.35           | 334.65         | 2.78              | 83.01%               | 257.78            | 77.03%               | 0.37%            |
| CO1PC26L    | Primary tumor cell 26        | CO1        | WGS             | 2.88           | 187.23         | 2.46              | 85.44%               | 153.43            | 81.95%               | 0.32%            |
| CO1PC27L    | Primary tumor cell 27        | CO1        | WGS             | 2.84           | 284.39         | 2.41              | 84.63%               | 223.91            | 78.73%               | 0.30%            |
| CO1PC28L    | Primary tumor cell 28        | CO1        | WGS             | 5.81           | 522.93         | 4.74              | 81.62%               | 379.65            | 72.60%               | 1.41%            |
| CO1C1L      | Circulating tumor cell 1     | CO1        | WGS             | 4.74           | 394.98         | 4.50              | 94.94%               | 362.82            | 91.86%               | 1.06%            |
| CO1C2L      | Circulating tumor cell 2     | CO1        | WGS             | 4.58           | 406.37         | 4.14              | 90.28%               | 339.60            | 83.57%               | 0.63%            |
| CO1C3L      | Circulating tumor cell 3     | CO1        | WGS             | 5.25           | 458.56         | 4.70              | 89.43%               | 393.39            | 85.79%               | 0.79%            |
| CO1C4L      | Circulating tumor cell 4     | CO1        | WGS             | 4.63           | 413.06         | 4.14              | 89.39%               | 355.57            | 86.08%               | 0.56%            |
| CO1C5L      | Circulating tumor cell 5     | CO1        | WGS             | 5.14           | 454.09         | 4.63              | 90.06%               | 379.23            | 83.52%               | 0.63%            |
| BR1C1L      | Circulating tumor cell 1     | BR1        | WGS             | 1.17           | 117.18         | 1.04              | 88.75%               | 100.17            | 85.49%               | 2.34%            |
| BR1C2L      | Circulating tumor cell 2     | BR1        | WGS             | 1.82           | 181.63         | 1.60              | 88.22%               | 154.39            | 85.00%               | 2.00%            |
| BR1C3L      | Circulating tumor cell 3     | BR1        | WGS             | 5.91           | 385.86         | 5.49              | 92.89%               | 347.59            | 90.08%               | 0.40%            |
| BR1C4L      | Circulating tumor cell 4     | BR1        | WGS             | 1.74           | 174.22         | 1.56              | 89.28%               | 150.18            | 86.20%               | 1.26%            |
| BR1C5L      | Circulating tumor cell 5     | BR1        | WGS             | 1.88           | 187.56         | 1.67              | 89.04%               | 160.94            | 85.80%               | 1.85%            |
| BR1C6L      | Circulating tumor cell 6     | BR1        | WGS             | 4.50           | 308.50         | 4.04              | 89.86%               | 271.91            | 88.14%               | 0.34%            |
| BR1C7L      | Circulating tumor cell 7     | BR1        | WGS             | 6.45           | 418.12         | 5.86              | 90.92%               | 370.07            | 88.51%               | 0.63%            |
| BR1C8L      | Circulating tumor cell 8     | BR1        | WGS             | 5.69           | 367.73         | 5.10              | 89.68%               | 320.94            | 87.27%               | 0.53%            |
| BR1C9L      | Circulating tumor cell 9     | BR1        | WGS             | 6.05           | 393.60         | 5.62              | 92.90%               | 355.04            | 90.20%               | 0.48%            |
| BR1C10L     | Circulating tumor cell 10    | BR1        | WGS             | 5.57           | 363.91         | 5.25              | 94.17%               | 332.62            | 91.40%               | 0.35%            |
| BR1C11L     | Circulating tumor cell 11    | BR1        | WGS             | 6.37           | 437.90         | 5.93              | 93.15%               | 401.63            | 91.72%               | 0.16%            |
| BR1C12L     | Circulating tumor cell 12    | BR1        | WGS             | 5.20           | 356.83         | 4.89              | 93.92%               | 329.98            | 92.48%               | 0.12%            |
| BR1C13L     | Circulating tumor cell 13    | BR1        | WGS             | 5.70           | 388.77         | 5.33              | 93.37%               | 357.10            | 91.85%               | 0.13%            |
| BR1C14L     | Circulating tumor cell 14    | BR1        | WGS             | 6.73           | 461.63         | 6.30              | 93.72%               | 426.85            | 92.47%               | 0.17%            |
| BR1C15L     | Circulating tumor cell 15    | BR1        | WGS             | 5.93           | 396.64         | 5.56              | 93.70%               | 363.87            | 91.74%               | 0.25%            |
| BR2C1L      | Circulating tumor cell 1     | BR2        | WGS             | 3.78           | 378.01         | 3.49              | 92.43%               | 334.70            | 88.54%               | 0.28%            |
| BR2C2L      | Circulating tumor cell 2     | BR2        | WGS             | 4.82           | 482.32         | 4.51              | 93.60%               | 435.43            | 90.28%               | 0.32%            |
| BR2C3L      | Circulating tumor cell 3     | BR2        | WGS             | 4.57           | 456.76         | 4.22              | 92.48%               | 405.38            | 88.75%               | 0.32%            |
| BR3C1L      | Circulating tumor cell 1     | BR3        | WGS             | 4.54           | 407.95         | 3.85              | 84.98%               | 310.09            | 76.01%               | 0.94%            |



|         |                          |     |     |       |         |       |        |         |        |       |
|---------|--------------------------|-----|-----|-------|---------|-------|--------|---------|--------|-------|
| BR3C2L  | Circulating tumor cell 2 | BR3 | WGS | 4.74  | 426.22  | 4.04  | 85.39% | 324.97  | 76.25% | 1.14% |
| BR4C1L  | Circulating tumor cell 1 | BR4 | WGS | 5.05  | 454.29  | 4.32  | 85.54% | 346.77  | 76.33% | 1.07% |
| BR4C2L  | Circulating tumor cell 2 | BR4 | WGS | 4.46  | 401.34  | 3.89  | 87.18% | 312.84  | 77.95% | 0.98% |
| BR5C1L  | Circulating tumor cell 1 | BR5 | WGS | 4.08  | 350.25  | 3.90  | 95.56% | 326.94  | 93.34% | 0.26% |
| BR5C2L  | Circulating tumor cell 2 | BR5 | WGS | 4.31  | 369.37  | 4.08  | 94.70% | 341.53  | 92.46% | 0.26% |
| BR5C3L  | Circulating tumor cell 3 | BR5 | WGS | 4.41  | 377.60  | 4.19  | 95.08% | 350.60  | 92.85% | 0.23% |
| BR5C4L  | Circulating tumor cell 4 | BR5 | WGS | 4.79  | 410.32  | 4.50  | 94.06% | 375.79  | 91.58% | 0.34% |
| BR6C1L  | Circulating tumor cell 1 | BR6 | WGS | 4.37  | 392.84  | 3.77  | 86.23% | 305.88  | 77.86% | 0.96% |
| BR6C2L  | Circulating tumor cell 2 | BR6 | WGS | 4.44  | 399.29  | 3.85  | 86.55% | 311.15  | 77.92% | 0.91% |
| BR6C3L  | Circulating tumor cell 3 | BR6 | WGS | 4.58  | 411.75  | 3.99  | 86.97% | 325.35  | 79.02% | 0.81% |
| BR6C4L  | Circulating tumor cell 4 | BR6 | WGS | 4.29  | 385.56  | 3.68  | 85.81% | 297.50  | 77.16% | 0.94% |
| BR7C1L  | Circulating tumor cell 1 | BR7 | WGS | 3.84  | 345.22  | 3.34  | 87.20% | 269.00  | 77.92% | 0.88% |
| BR7C2L  | Circulating tumor cell 2 | BR7 | WGS | 4.09  | 368.00  | 3.53  | 86.33% | 283.62  | 77.07% | 0.95% |
| BR7C3L  | Circulating tumor cell 3 | BR7 | WGS | 4.23  | 380.78  | 3.69  | 87.29% | 296.95  | 77.98% | 0.97% |
| BR8C1L  | Circulating tumor cell 1 | BR8 | WGS | 2.30  | 230.48  | 1.55  | 67.39% | 144.38  | 62.64% | 0.43% |
| BR8C2L  | Circulating tumor cell 2 | BR8 | WGS | 2.14  | 214.41  | 1.47  | 68.70% | 136.80  | 63.80% | 0.36% |
| BR8C3L  | Circulating tumor cell 3 | BR8 | WGS | 2.21  | 221.24  | 1.55  | 70.07% | 144.95  | 65.52% | 0.47% |
| BR9C1L  | Circulating tumor cell 1 | BR9 | WGS | 6.14  | 524.25  | 5.88  | 95.75% | 494.42  | 94.31% | 0.51% |
| BR9C2L  | Circulating tumor cell 2 | BR9 | WGS | 6.25  | 533.73  | 5.94  | 95.04% | 499.36  | 93.56% | 0.52% |
| BR9C3L  | Circulating tumor cell 3 | BR9 | WGS | 6.53  | 552.67  | 6.25  | 95.63% | 520.04  | 94.10% | 0.54% |
| BR9C4L  | Circulating tumor cell 4 | BR9 | WGS | 7.15  | 607.90  | 6.83  | 95.50% | 571.34  | 93.99% | 0.42% |
| CO2C1L  | Circulating tumor cell 1 | CO2 | WGS | 7.94  | 517.00  | 7.41  | 93.38% | 468.76  | 90.67% | 0.47% |
| CO2C2L  | Circulating tumor cell 2 | CO2 | WGS | 6.85  | 618.27  | 6.13  | 89.43% | 529.36  | 85.62% | 0.84% |
| CO2C3L  | Circulating tumor cell 3 | CO2 | WGS | 5.27  | 342.09  | 4.92  | 93.45% | 310.46  | 90.75% | 0.32% |
| CO2C4L  | Circulating tumor cell 4 | CO2 | WGS | 4.43  | 392.13  | 3.98  | 89.86% | 325.76  | 83.07% | 0.56% |
| CO2C5L  | Circulating tumor cell 5 | CO2 | WGS | 4.43  | 391.57  | 3.99  | 90.08% | 327.79  | 83.71% | 0.59% |
| CO2C6L  | Circulating tumor cell 6 | CO2 | WGS | 7.11  | 463.38  | 6.66  | 93.67% | 422.33  | 91.14% | 0.50% |
| CO2C7L  | Circulating tumor cell 7 | CO2 | WGS | 6.14  | 554.52  | 5.54  | 90.27% | 480.29  | 86.61% | 0.85% |
| GA1C1L  | Circulating tumor cell 1 | GA1 | WGS | 5.08  | 443.36  | 4.65  | 91.44% | 383.44  | 86.48% | 0.38% |
| GA1C2L  | Circulating tumor cell 2 | GA1 | WGS | 5.22  | 452.94  | 4.81  | 92.22% | 395.98  | 87.42% | 0.40% |
| GA1C3L  | Circulating tumor cell 3 | GA1 | WGS | 7.78  | 503.26  | 7.13  | 91.62% | 449.07  | 89.23% | 0.52% |
| GA1C4L  | Circulating tumor cell 4 | GA1 | WGS | 6.83  | 443.11  | 6.26  | 91.68% | 395.04  | 89.15% | 0.48% |
| GA1C5L  | Circulating tumor cell 5 | GA1 | WGS | 4.52  | 293.64  | 4.21  | 93.00% | 265.73  | 90.49% | 0.32% |
| GA2C1L  | Circulating tumor cell 1 | GA2 | WGS | 4.14  | 355.72  | 3.93  | 94.79% | 329.05  | 92.50% | 0.26% |
| GA2C2L  | Circulating tumor cell 2 | GA2 | WGS | 5.31  | 464.71  | 4.82  | 90.79% | 398.88  | 85.83% | 0.45% |
| GA3C1L  | Circulating tumor cell 1 | GA3 | WGS | 4.82  | 420.23  | 4.41  | 91.55% | 361.99  | 86.14% | 0.47% |
| GA4C1L  | Circulating tumor cell 1 | GA4 | WGS | 3.81  | 332.04  | 3.42  | 89.72% | 279.03  | 84.04% | 0.34% |
| GA5C1L  | Circulating tumor cell 1 | GA5 | WGS | 3.83  | 382.98  | 3.38  | 88.13% | 323.33  | 84.42% | 0.04% |
| GA5C2L  | Circulating tumor cell 2 | GA5 | WGS | 3.88  | 333.51  | 3.69  | 95.22% | 310.15  | 93.00% | 0.27% |
| GA5C3L  | Circulating tumor cell 3 | GA5 | WGS | 4.27  | 426.55  | 3.73  | 87.42% | 358.31  | 84.00% | 0.05% |
| GA6C1L  | Circulating tumor cell 1 | GA6 | WGS | 3.46  | 300.51  | 3.15  | 91.04% | 259.60  | 86.38% | 0.43% |
| GA6C2L  | Circulating tumor cell 2 | GA6 | WGS | 4.69  | 389.38  | 4.38  | 93.47% | 351.45  | 90.26% | 0.99% |
| GA6C3L  | Circulating tumor cell 3 | GA6 | WGS | 4.30  | 356.94  | 4.07  | 94.63% | 326.75  | 91.54% | 0.95% |
| GA7C1L  | Circulating tumor cell 1 | GA7 | WGS | 4.27  | 426.65  | 3.75  | 87.91% | 359.92  | 84.36% | 0.04% |
| GA7C2L  | Circulating tumor cell 2 | GA7 | WGS | 3.56  | 356.07  | 3.11  | 87.32% | 297.07  | 83.43% | 0.06% |
| GA7C3L  | Circulating tumor cell 3 | GA7 | WGS | 3.62  | 362.17  | 3.20  | 88.39% | 305.89  | 84.46% | 0.04% |
| GA7C4L  | Circulating tumor cell 4 | GA7 | WGS | 4.21  | 421.16  | 3.70  | 87.96% | 356.55  | 84.66% | 0.06% |
| PR1C1L  | Circulating tumor cell 1 | PR1 | WGS | 3.64  | 329.51  | 3.26  | 89.56% | 283.78  | 86.12% | 0.70% |
| PR1C2L  | Circulating tumor cell 2 | PR1 | WGS | 4.47  | 381.86  | 4.24  | 94.90% | 353.48  | 92.57% | 0.28% |
| PR1C3L  | Circulating tumor cell 3 | PR1 | WGS | 3.83  | 346.65  | 3.46  | 90.19% | 300.27  | 86.62% | 0.66% |
| PR1C4L  | Circulating tumor cell 4 | PR1 | WGS | 4.90  | 422.11  | 4.64  | 94.77% | 390.70  | 92.56% | 0.26% |
| PR1C5L  | Circulating tumor cell 5 | PR1 | WGS | 4.98  | 428.87  | 4.70  | 94.51% | 395.99  | 92.33% | 0.28% |
| PR1C6L  | Circulating tumor cell 6 | PR1 | WGS | 4.49  | 385.58  | 4.25  | 94.58% | 355.19  | 92.12% | 0.30% |
| PR2C1L  | Circulating tumor cell 1 | PR2 | WGS | 2.71  | 271.49  | 2.43  | 89.65% | 235.80  | 86.85% | 0.13% |
| PR2C2L  | Circulating tumor cell 2 | PR2 | WGS | 2.40  | 240.09  | 2.07  | 86.26% | 199.41  | 83.06% | 0.28% |
| PR2C3L  | Circulating tumor cell 3 | PR2 | WGS | 4.68  | 427.49  | 4.26  | 90.98% | 375.32  | 87.80% | 0.70% |
| PR2C4L  | Circulating tumor cell 4 | PR2 | WGS | 2.01  | 200.71  | 1.74  | 86.54% | 167.28  | 83.34% | 0.34% |
| PR2C5L  | Circulating tumor cell 5 | PR2 | WGS | 4.12  | 375.63  | 3.73  | 90.47% | 328.71  | 87.51% | 0.69% |
| PR2C6L  | Circulating tumor cell 6 | PR2 | WGS | 2.55  | 255.40  | 2.26  | 88.50% | 217.80  | 85.28% | 0.11% |
| PR2C7L  | Circulating tumor cell 7 | PR2 | WGS | 2.38  | 238.33  | 2.07  | 86.81% | 199.86  | 83.86% | 0.12% |
| PR3C1L  | Circulating tumor cell 1 | PR3 | WGS | 5.18  | 441.42  | 4.91  | 94.76% | 411.63  | 93.25% | 0.30% |
| PR3C2L  | Circulating tumor cell 2 | PR3 | WGS | 4.82  | 410.49  | 4.57  | 94.68% | 382.01  | 93.06% | 0.30% |
| PR3C3L  | Circulating tumor cell 3 | PR3 | WGS | 6.21  | 530.71  | 5.88  | 94.69% | 494.53  | 93.18% | 0.31% |
| PR3C4L  | Circulating tumor cell 4 | PR3 | WGS | 6.28  | 572.35  | 5.70  | 90.73% | 502.28  | 87.76% | 0.77% |
| PR3C5L  | Circulating tumor cell 5 | PR3 | WGS | 3.99  | 363.87  | 3.60  | 90.35% | 317.66  | 87.30% | 0.65% |
| PR3C6L  | Circulating tumor cell 6 | PR3 | WGS | 4.32  | 389.25  | 3.90  | 90.35% | 338.87  | 87.06% | 0.74% |
| PR4C1L  | Circulating tumor cell 1 | PR4 | WGS | 2.55  | 254.57  | 2.19  | 86.14% | 210.24  | 82.59% | 0.18% |
| PR4C2L  | Circulating tumor cell 2 | PR4 | WGS | 4.61  | 418.17  | 4.07  | 88.38% | 355.04  | 84.90% | 0.71% |
| PR4C3L  | Circulating tumor cell 3 | PR4 | WGS | 2.35  | 235.48  | 2.05  | 86.88% | 196.07  | 83.27% | 0.13% |
| PR4C4L  | Circulating tumor cell 4 | PR4 | WGS | 2.09  | 208.70  | 1.82  | 87.21% | 176.08  | 84.37% | 0.29% |
| PR5C1L  | Circulating tumor cell 1 | PR5 | WGS | 3.58  | 358.48  | 3.41  | 95.00% | 335.80  | 93.67% | 0.20% |
| PR5C2L  | Circulating tumor cell 2 | PR5 | WGS | 5.07  | 507.21  | 4.77  | 94.08% | 466.72  | 92.02% | 0.80% |
| PR5C3L  | Circulating tumor cell 3 | PR5 | WGS | 5.08  | 507.92  | 4.80  | 94.44% | 468.45  | 92.23% | 0.52% |
| BR1C2D  | circulating tumor cell 2 | BR1 | WGS | 24.48 | 2018.89 | 22.58 | 92.27% | 1805.15 | 89.41% | 2.14% |
| BR2C1D  | circulating tumor cell 1 | BR2 | WGS | 26.84 | 2202.70 | 25.66 | 95.63% | 2059.97 | 93.52% | 2.11% |
| BR3C1D  | circulating tumor cell 1 | BR3 | WGS | 29.52 | 2439.03 | 28.06 | 95.06% | 2266.08 | 92.91% | 2.17% |
| BR4C2D  | circulating tumor cell 2 | BR4 | WGS | 28.49 | 2347.24 | 27.25 | 95.65% | 2196.49 | 93.58% | 1.93% |
| BR5C2D  | circulating tumor cell 2 | BR5 | WGS | 30.35 | 2584.11 | 29.07 | 95.80% | 2441.44 | 94.48% | 0.37% |
| BR6C1D  | circulating tumor cell 1 | BR6 | WGS | 26.96 | 2216.22 | 25.53 | 94.69% | 2049.91 | 92.50% | 2.50% |
| BR7C2D  | circulating tumor cell 2 | BR7 | WGS | 26.98 | 2216.83 | 25.77 | 95.52% | 2071.24 | 93.43% | 1.85% |
| BR8C1D  | circulating tumor cell 1 | BR8 | WGS | 27.78 | 2274.51 | 26.58 | 95.70% | 2129.63 | 93.63% | 2.93% |
| BR9C1D  | circulating tumor cell 1 | BR9 | WGS | 29.02 | 2297.94 | 27.21 | 93.75% | 2123.98 | 92.43% | 0.57% |
| CO1C1D1 | circulating tumor cell 1 | CO1 | WGS | 27.97 | 2303.44 | 26.97 | 96.43% | 2170.95 | 94.25% | 2.27% |
| CO2C7D  | circulating tumor cell 7 | CO2 | WGS | 25.88 | 2138.56 | 24.62 | 95.12% | 1983.35 | 92.74% | 1.82% |

|        |                          |     |     |       |         |       |        |         |        |       |
|--------|--------------------------|-----|-----|-------|---------|-------|--------|---------|--------|-------|
| GA1C5D | circulating tumor cell 5 | GA1 | WGS | 25.90 | 2123.79 | 24.72 | 95.45% | 1979.00 | 93.18% | 1.88% |
| GA2C1D | circulating tumor cell 1 | GA2 | WGS | 27.41 | 2337.34 | 26.21 | 95.62% | 2203.08 | 94.26% | 0.31% |
| GA3C1D | circulating tumor cell 1 | GA3 | WGS | 15.85 | 1071.65 | 14.74 | 93.04% | 975.53  | 91.03% | 0.36% |
| GA4C1D | circulating tumor cell 1 | GA4 | WGS | 16.65 | 1120.23 | 15.16 | 91.05% | 996.67  | 88.97% | 0.31% |
| GA5C1D | circulating tumor cell 1 | GA5 | WGS | 29.61 | 2527.66 | 28.53 | 96.36% | 2400.90 | 94.99% | 0.31% |
| GA6C2D | circulating tumor cell 2 | GA6 | WGS | 23.35 | 1916.13 | 22.14 | 94.85% | 1772.92 | 92.53% | 1.74% |
| GA7C2D | circulating tumor cell 2 | GA7 | WGS | 28.93 | 2466.74 | 27.83 | 96.20% | 2339.31 | 94.83% | 0.41% |
| PR1C1D | circulating tumor cell 1 | PR1 | WGS | 29.83 | 1957.15 | 26.75 | 89.68% | 1689.53 | 86.33% | 2.00% |
| PR2C2D | circulating tumor cell 2 | PR2 | WGS | 25.19 | 2071.86 | 22.86 | 90.76% | 1818.48 | 87.77% | 2.49% |
| PR3C1D | circulating tumor cell 1 | PR3 | WGS | 30.75 | 2622.86 | 29.22 | 95.05% | 2457.59 | 93.70% | 0.40% |
| PR4C3D | circulating tumor cell 3 | PR4 | WGS | 29.02 | 2386.95 | 26.72 | 92.08% | 2127.68 | 89.14% | 2.55% |
| PR5C2D | circulating tumor cell 2 | PR5 | WGS | 24.25 | 1996.74 | 23.46 | 96.76% | 1893.14 | 94.81% | 3.08% |

**Table S4. Mutation information and PCR primers for the 20 SNVs in Patient CO1**

| Gene    | Chromosome | Position  | Wild Type | Mutant | Primers                                    | sequence (5'-3')                                                                                    |
|---------|------------|-----------|-----------|--------|--------------------------------------------|-----------------------------------------------------------------------------------------------------|
| ZNF165  | Chr6       | 28056791  | A         | C      | Forward<br>Reverse                         | CCTGTGACCAGAGCTTCAA<br>GTGAATTCGCCGATGTCTAGTA                                                       |
| TRPC3   | Chr4       | 122831528 | C         | G      | Forward<br>Reverse                         | AGATGGACAGCATCCCAAAG<br>TTAGCAGGAGCTTCTCCATTTA                                                      |
| LAG3    | Chr12      | 6883836   | G         | A      | Forward<br>Reverse                         | TGATGTGGGAGAGGAGAAGA<br>GAGGAAGCTTCCGCTAAGT                                                         |
| SAMD9L  | Chr7       | 92760652  | T         | A      | Forward<br>Reverse                         | TGCCATGAGAATAGAGAGAGAGA<br>ACCTCTGCGTCTCTAA                                                         |
| BRF2    | Chr8       | 37702522  | C         | T      | Forward<br>Reverse                         | CGATGTGCTTCACCACAGA<br>AGAAGATGCTGTCTCGAACAAAT                                                      |
| TGIF2   | Chr20      | 35219641  | G         | A      | Forward<br>Reverse<br>*Forward<br>*Reverse | CAATGTGCTCTCCTGTCTG<br>TGTGCAGTAATGGGAGTGATG<br>TGTCTGTGTGCTCCATGC<br>TGGTGCGTGTGAAGAG              |
| CWF19L2 | Chr11      | 107197743 | G         | T      | Forward<br>Reverse<br>*Forward<br>*Reverse | TGAGGGTCAGTTGCTTCATTAG<br>TACATGCTTGTGTTTGTGCTTT<br>AAGTCATATGGTTCCACCACT<br>GGAAATCATAGGTGGGATGCT  |
| PTBP3   | Chr9       | 114989690 | C         | T      | Forward<br>Reverse                         | TTTAGAGTGTAGGATTGGAGATAACC<br>GACCAAGGTCTGACTAAGGATTT                                               |
| DNAH17  | Chr17      | 76422660  | C         | T      | Forward<br>Reverse                         | CGAGTCTTAGGAAGCCTCTCA<br>AGAGGCGCAGCACAAAG                                                          |
| DYNC111 | Chr7       | 95606859  | G         | T      | Forward<br>Reverse                         | TGATTGGAACCTTACCCTTACC<br>CAGTCAAGAAATAAATGACTCTTGC                                                 |
| CRIM1   | Chr2       | 36706666  | G         | A      | Forward<br>Reverse                         | GAAGATGCTCAGTCTAACTGAA<br>TTGACGCACTGGCAGAAT                                                        |
| SYT14   | Chr1       | 210334241 | A         | C      | Forward<br>Reverse                         | ATGGGTCAAGAGATGTCCAAAT<br>TGCTGCCTTTGATGGTAACT                                                      |
| FPR3    | Chr19      | 52327071  | G         | A      | Forward<br>Reverse                         | GTTGTATTGTAAGATGGTGTACAG<br>AGGATGGCACTGAAAGAGAAG                                                   |
| FN1     | Chr2       | 216272920 | G         | A      | Forward<br>Reverse<br>*Forward<br>*Reverse | CAGGTCCGCACTCAGAATC<br>AGCCACTTCTGTGAACATCC<br>CGCTTAGCTGACCTGTGAT<br>GCCTGTAGTAGCACTTCTG           |
| ABCD4   | Chr14      | 74753441  | G         | A      | Forward<br>Reverse                         | CTGAGCCTTTGGGTTCTTTCT<br>GAAGCCAGAGCAGCTTTCA                                                        |
| CD80    | Chr3       | 119276553 | C         | A      | Forward<br>Reverse                         | CCTGAAAGTTGCTTACCTGAAC<br>TTTGGAGACCCAGGAACAC                                                       |
| MUC16   | Chr19      | 9028305   | A         | G      | Forward<br>Reverse<br>*Forward<br>*Reverse | CATGTAGAGCACAGGACCAAA<br>ATGGAGAGGTGGATGGACTAA<br>ATCACAGCTGCTCACCATT<br>AAGACCTCGGACTGGACA         |
| SCAND3  | Chr6       | 28543756  | C         | G      | Forward<br>Reverse<br>*Forward<br>*Reverse | TGTCCAATGCTGAGATGTGTATTA<br>AGAAGCTTAGCAAGTTACTGG<br>GCGACGGTAGTCAACTGATTC<br>AGAAGCTTAGCAAGTTACTGG |
| CNTNAP5 | Chr2       | 125521571 | G         | A      | Forward<br>Reverse<br>*Forward<br>*Reverse | CAGTGTGCCCTAGTCTTGAAA<br>TACAAATGCCACTAGTGACTG<br>TGTCCAGTGCTTCCCATAC<br>AGGTAGGAAAGTGGAGGTAAGA     |
| PLCG2   | Chr16      | 81942154  | G         | A      | Forward<br>Reverse                         | GTTCCACAAGAAGGTGGAGAAG<br>TTACCAAGAAGGACAGGGTGTAG                                                   |

\*A second primer pair was used for single cell samples that do not have PCR products with the first primer pair.

**Table S5. Concurrent and mutually exclusive regions**

| Concurrent CNV regions |        |                  |          |        |                  |                 |
|------------------------|--------|------------------|----------|--------|------------------|-----------------|
| Region 1               |        |                  | Region 2 |        |                  | P-value(-log10) |
| Cytoband               | GISTIC | Oncogenes / TSGs | Cytoband | GISTIC | Oncogenes / TSGs |                 |
| 7p12.2                 | gain   | IKZF1            | 6p21.1   | gain   |                  | 7.00            |
| 9q34.2                 | gain   |                  | 8q22.3   | gain   |                  | 6.48            |
| 9q34.12                | gain   | ABL1             | 6p21.1   | gain   |                  | 7.09            |
| 3q26.33                | gain   | SOX2             | 7p12.2   | gain   | IKZF1            | 6.55            |
| 3q24                   | gain   |                  | 7q21.2   | gain   |                  | 6.88            |
| 3q27.3                 | gain   |                  | 7p12.3   | gain   |                  | 6.67            |
| 3q24                   | gain   |                  | 7q21.3   | gain   |                  | 6.90            |
| 9q34.12                | gain   | ABL1             | 8q22.3   | gain   |                  | 6.92            |
| 9q34.2                 | gain   |                  | 6p21.1   | gain   |                  | 6.85            |
| 3q26.33                | gain   | SOX2             | 8q13.2   | gain   |                  | 6.86            |
| 9q34.12                | gain   | ABL1             | 8q24.11  | gain   |                  | 7.16            |
| 3q26.33                | gain   | SOX2             | 8q22.2   | gain   |                  | 7.17            |
| 3q26.33                | gain   | SOX2             | 8q22.3   | gain   |                  | 6.78            |
| 3q24                   | gain   |                  | 8q13.1   | gain   |                  | 7.57            |
| 13q22.1                | loss   | DIS3             | 8p22     | loss   |                  | 6.80            |
| 3q26.33                | gain   | SOX2             | 8q23.1   | gain   |                  | 7.43            |
| 3q26.33                | gain   | SOX2             | 8q23.2   | gain   |                  | 7.78            |
| 3q26.33                | gain   | SOX2             | 8q23.3   | gain   |                  | 6.59            |
| 14q32.32               | loss   |                  | 8p11.21  | gain   |                  | 8.89            |
| 9q34.2                 | gain   |                  | 11q13.3  | gain   | CCND1            | 7.03            |
| 3q26.32                | gain   | PIK3CA           | 8q22.2   | gain   |                  | 6.61            |
| 10q11.21               | loss   | RET              | 8p22     | loss   |                  | 7.10            |
| 3q26.32                | gain   | PIK3CA           | 8q23.1   | gain   |                  | 6.47            |
| 7q11.23                | gain   |                  | 5p15.33  | gain   | TERT             | 6.94            |
| 3q23                   | gain   |                  | 8q13.1   | gain   |                  | 7.52            |
| 3q23                   | gain   |                  | 8q22.1   | gain   |                  | 7.12            |
| 3q23                   | gain   |                  | 8q22.2   | gain   |                  | 7.16            |
| 3q23                   | gain   |                  | 8q13.3   | gain   |                  | 6.65            |
| 3q23                   | gain   |                  | 8q22.3   | gain   |                  | 6.70            |
| 11q13.3                | gain   | CCND1            | 6p21.1   | gain   |                  | 8.23            |
| 3q26.32                | gain   | PIK3CA           | 7p12.2   | gain   | IKZF1            | 8.48            |
| 8q23.3                 | gain   |                  | 17q23.2  | gain   |                  | 6.60            |
| 3q25.1                 | gain   |                  | 8q13.1   | gain   |                  | 7.35            |
| 1q22                   | gain   |                  | 17q25.1  | gain   | SRSF2            | 6.56            |
| 13q22.1                | loss   | DIS3             | 19p13.11 | gain   | JAK3             | 6.56            |
| 1q22                   | gain   |                  | 17q25.3  | gain   |                  | 6.50            |
| 7q22.1                 | gain   |                  | 5p15.33  | gain   | TERT             | 6.83            |
| 3q25.1                 | gain   |                  | 7q21.2   | gain   |                  | 8.24            |
| 11q13.1                | gain   | MEN1             | 20q11.22 | gain   |                  | 6.84            |
| 9q34.3                 | gain   | NOTCH1           | 6p21.1   | gain   |                  | 8.30            |
| 3q25.1                 | gain   |                  | 7q21.3   | gain   |                  | 8.56            |
| 7q31.31                | gain   |                  | 18q21.2  | loss   | SMAD4            | 6.45            |
| 3q28                   | gain   |                  | 8q23.3   | gain   |                  | 6.56            |
| 9q34.3                 | gain   | NOTCH1           | 7p12.2   | gain   | IKZF1            | 6.99            |

| Mutually Exclusive CNV regions |        |                  |          |        |                  |                 |
|--------------------------------|--------|------------------|----------|--------|------------------|-----------------|
| Region 1                       |        |                  | Region 2 |        |                  | P-value(-log10) |
| Cytoband                       | GISTIC | Oncogenes / TSGs | Cytoband | GISTIC | Oncogenes / TSGs |                 |
| 3q27.2                         | gain   |                  | 10q11.21 | loss   | RET              | 4.17            |
| 3q22.2                         | gain   |                  | 10q11.21 | loss   | RET              | 4.80            |
| 9q34.3                         | gain   | NOTCH1           | 13q21.1  | loss   |                  | 4.95            |
| 8q23.1                         | gain   |                  | 7p22.2   | gain   | CARD11           | 3.94            |
| 9q34.3                         | gain   | NOTCH1           | 13q21.2  | loss   |                  | 4.05            |
| 8q22.3                         | gain   |                  | 13q22.2  | loss   |                  | 3.73            |
| 9q34.2                         | gain   |                  | 13q21.1  | loss   |                  | 4.94            |
| 3q26.31                        | gain   |                  | 13q21.33 | loss   |                  | 4.02            |

|          |      |        |          |      |        |      |
|----------|------|--------|----------|------|--------|------|
| 9q34.2   | gain |        | 13q21.2  | loss |        | 4.21 |
| 9q34.2   | gain |        | 13q21.31 | loss |        | 3.84 |
| 3q27.3   | gain |        | 10q11.21 | loss | RET    | 4.48 |
| 3q26.31  | gain |        | 8p22     | loss |        | 3.85 |
| 8q23.2   | gain |        | 10q11.21 | loss | RET    | 3.75 |
| 3q22.2   | gain |        | 8p21.2   | loss | NKX3-1 | 3.78 |
| 3q26.31  | gain |        | 8p12     | loss |        | 4.79 |
| 3q26.1   | gain |        | 10q11.21 | loss | RET    | 3.91 |
| 7q31.2   | gain | MET    | 8p21.1   | loss |        | 3.80 |
| 3q26.32  | gain | PIK3CA | 8p22     | loss |        | 3.96 |
| 6q26     | loss |        | 8q22.3   | gain |        | 3.83 |
| 6p21.1   | gain |        | 8p23.1   | loss |        | 4.08 |
| 3q26.32  | gain | PIK3CA | 8p21.2   | loss | NKX3-1 | 4.17 |
| 3q26.32  | gain | PIK3CA | 7p22.3   | gain |        | 3.89 |
| 6p21.1   | gain |        | 8p22     | loss |        | 3.92 |
| 3q26.33  | gain | SOX2   | 13q21.2  | loss |        | 3.95 |
| 13q14.13 | loss |        | 6p21.1   | gain |        | 3.70 |
| 6p21.1   | gain |        | 8p21.3   | loss |        | 4.66 |
| 3q26.32  | gain | PIK3CA | 8p12     | loss |        | 4.42 |
| 6q26     | loss |        | 9p22.3   | loss | PSIP1  | 4.19 |
| 6p21.1   | gain |        | 8p21.2   | loss | NKX3-1 | 5.94 |
| 3q27.3   | gain |        | 8p22     | loss |        | 4.08 |
| 9q34.12  | gain | ABL1   | 13q21.1  | loss |        | 4.71 |
| 8q23.2   | gain |        | 7p22.2   | gain | CARD11 | 4.60 |
| 6p21.1   | gain |        | 8p21.1   | loss |        | 4.26 |
| 3q26.32  | gain | PIK3CA | 10q11.21 | loss | RET    | 3.75 |
| 9q34.12  | gain | ABL1   | 13q21.2  | loss |        | 3.82 |
| 8q23.3   | gain |        | 7p22.1   | gain | RAC1   | 4.35 |
| 8q23.2   | gain |        | 7p22.1   | gain | RAC1   | 4.68 |
| 6p21.1   | gain |        | 8p12     | loss |        | 4.06 |
| 3q27.3   | gain |        | 8p21.2   | loss | NKX3-1 | 4.33 |
| 3q26.33  | gain | SOX2   | 8p21.2   | loss | NKX3-1 | 4.31 |
| 3q26.33  | gain | SOX2   | 7p22.3   | gain |        | 3.76 |
| 20q13.13 | gain |        | 8p23.1   | loss |        | 4.19 |
| 9q34.12  | gain | ABL1   | 13q21.31 | loss |        | 3.69 |
| 3q26.33  | gain | SOX2   | 13q22.2  | loss |        | 3.72 |
| 3q28     | gain |        | 8p22     | loss |        | 3.87 |
| 3q27.3   | gain |        | 8p12     | loss |        | 3.91 |
| 3q26.33  | gain | SOX2   | 8p12     | loss |        | 4.03 |
| 20q13.13 | gain |        | 8p21.3   | loss |        | 3.83 |
| 13q14.2  | loss | RB1    | 6p21.1   | gain |        | 3.98 |
| 3q28     | gain |        | 7p22.3   | gain |        | 4.84 |
| 3q26.33  | gain | SOX2   | 10q11.21 | loss | RET    | 4.49 |
| 20q13.13 | gain |        | 8p21.2   | loss | NKX3-1 | 4.14 |
| 8q23.2   | gain |        | 13q22.2  | loss |        | 4.56 |
| 3q28     | gain |        | 8p21.2   | loss | NKX3-1 | 4.11 |
| 3q26.1   | gain |        | 7p22.3   | gain |        | 4.35 |
| 3q26.33  | gain | SOX2   | 8p22     | loss |        | 4.76 |
| 8q24.21  | gain | MYC    | 15q15.2  | loss |        | 4.49 |
| 20q13.12 | gain | NCOA3  | 8p22     | loss |        | 3.85 |
| 3q22.3   | gain | FOXL2  | 16q11.2  | loss |        | 4.01 |
| 3q22.3   | gain | FOXL2  | 10q11.21 | loss | RET    | 4.50 |
| 10q11.21 | loss | RET    | 6p21.1   | gain |        | 4.48 |
| 3q27.1   | gain |        | 8p21.2   | loss | NKX3-1 | 3.85 |
| 20q13.12 | gain | NCOA3  | 8p21.2   | loss | NKX3-1 | 3.92 |
| 10q23.31 | loss | PTEN   | 9p22.3   | loss | PSIP1  | 4.31 |
| 3q28     | gain |        | 10q11.21 | loss | RET    | 4.30 |
| 10q23.31 | loss | PTEN   | 9p22.2   | loss |        | 4.86 |
| 7p14.3   | gain |        | 8p21.2   | loss | NKX3-1 | 3.91 |
| 20q13.11 | gain |        | 8p22     | loss |        | 4.78 |
| 3q23     | gain |        | 10q11.21 | loss | RET    | 4.81 |
| 20q13.11 | gain |        | 8p21.3   | loss |        | 4.31 |
| 7p12.2   | gain | IKZF1  | 8p21.2   | loss | NKX3-1 | 3.84 |
| 3q26.1   | gain |        | 15q13.1  | loss |        | 3.98 |

|          |      |      |          |      |        |      |
|----------|------|------|----------|------|--------|------|
| 20q13.11 | gain |      | 8p21.2   | loss | NKX3-1 | 4.68 |
| 11q13.4  | gain |      | 13q21.2  | loss |        | 4.39 |
| 3q27.1   | gain |      | 8p22     | loss |        | 3.70 |
| 20q13.11 | gain |      | 8p21.1   | loss |        | 6.62 |
| 11q13.4  | gain |      | 13q21.32 | loss |        | 3.99 |
| 11q13.4  | gain |      | 13q14.12 | loss |        | 4.39 |
| 20q13.32 | gain | GNAS | 8p21.1   | loss |        | 4.50 |
| 11q13.4  | gain |      | 13q21.33 | loss |        | 4.15 |
| 11q13.4  | gain |      | 13q14.13 | loss |        | 5.37 |
| 11q13.4  | gain |      | 13q14.2  | loss | RB1    | 5.80 |
| 8q22.1   | gain |      | 13q21.31 | loss |        | 3.86 |
| 11q13.4  | gain |      | 13q14.3  | loss |        | 4.84 |
| 20q13.31 | gain |      | 8p23.1   | loss |        | 4.07 |
| 7p12.3   | gain |      | 8p21.2   | loss | NKX3-1 | 4.15 |
| 20q13.31 | gain |      | 8p21.3   | loss |        | 3.89 |
| 20q13.31 | gain |      | 8p21.2   | loss | NKX3-1 | 4.05 |
| 20q13.31 | gain |      | 8p21.1   | loss |        | 5.43 |
| 3q27.1   | gain |      | 13q21.2  | loss |        | 4.85 |
| 13q22.1  | loss | DIS3 | 11q13.4  | gain |        | 4.38 |
| 11q13.5  | gain |      | 13q14.3  | loss |        | 4.38 |
| 3q27.1   | gain |      | 13q21.31 | loss |        | 3.82 |
| 8q24.11  | gain |      | 7p22.2   | gain | CARD11 | 4.16 |
| 3q26.2   | gain |      | 13q21.2  | loss |        | 3.77 |
| 11q13.5  | gain |      | 13q21.2  | loss |        | 4.37 |
| 8q24.11  | gain |      | 7p22.1   | gain | RAC1   | 3.92 |
| 3q27.1   | gain |      | 13q14.13 | loss |        | 3.77 |
| 20q13.2  | gain |      | 8p21.1   | loss |        | 5.47 |
| 3q26.2   | gain |      | 8p22     | loss |        | 4.48 |
| 11q13.5  | gain |      | 13q14.12 | loss |        | 4.05 |
| 3q27.1   | gain |      | 13q22.2  | loss |        | 4.43 |
| 3q26.2   | gain |      | 13q21.33 | loss |        | 4.15 |
| 17q24.2  | gain |      | 8p21.2   | loss | NKX3-1 | 4.87 |
| 11q13.5  | gain |      | 13q14.13 | loss |        | 4.88 |
| 3q27.1   | gain |      | 13q21.1  | loss |        | 4.43 |
| 3q26.2   | gain |      | 8p21.2   | loss | NKX3-1 | 4.13 |
| 11q13.5  | gain |      | 13q22.1  | loss | DIS3   | 3.86 |
| 11q13.5  | gain |      | 13q14.2  | loss | RB1    | 4.85 |
| 3q26.2   | gain |      | 13q22.2  | loss |        | 3.71 |
| 3q26.2   | gain |      | 8p12     | loss |        | 5.08 |
| 8q22.2   | gain |      | 13q22.2  | loss |        | 4.38 |
| 7p12.1   | gain |      | 8p12     | loss |        | 3.96 |
| 20q13.33 | gain |      | 8p21.2   | loss | NKX3-1 | 3.92 |
| 8q23.1   | gain |      | 7p22.1   | gain | RAC1   | 4.94 |
| 3q26.31  | gain |      | 10q11.21 | loss | RET    | 3.91 |
| 3q26.2   | gain |      | 10q11.21 | loss | RET    | 4.63 |
| 20q13.33 | gain |      | 8p21.1   | loss |        | 4.89 |
| 17q24.2  | gain |      | 8p21.3   | loss |        | 4.14 |
| 8q24.12  | gain |      | 10q11.21 | loss | RET    | 4.23 |
